# Supplementary material for: PAMA–Arg brush-functionalized magnetic composite nanospheres for highly effective enrichment of phosphorylated biomolecules
Source: Royal Society of Chemistry journal article supplement (doi:10.1039/c8tb00705e), 2018-01-01
Supplement: c8tb00705e1.pdf [file c8tb00705e1.pdf]

## Supplementary Information

### PAMA-Arg Brushes Functionalized Magnetic Composite Nanospheres for Highly Effective Enrichment of the Phosphorylated Biomolecules

Bin Luo, Xiaoxi Zhou, Peipei Jiang, Qiangying Yi, Fang Lan\*, and Yao Wu\*

National Engineering Research Center for Biomaterials, Sichuan University, Chengdu, Sichuan  
610064, P.R. China

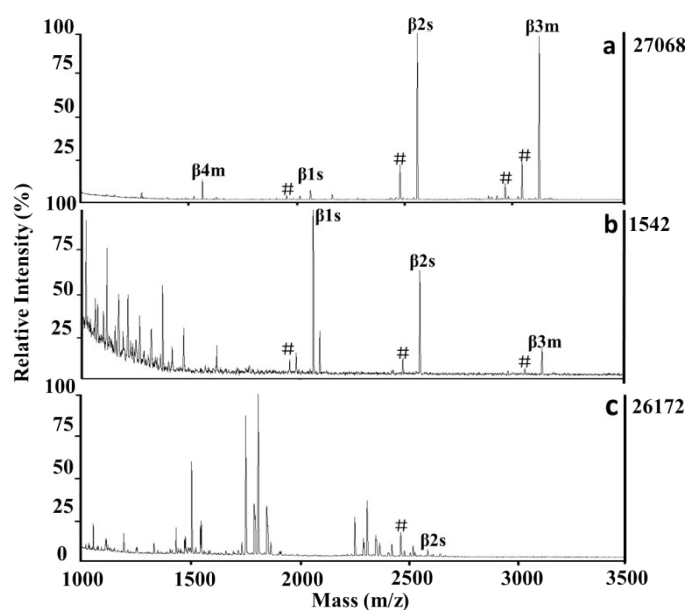

**Fig. S1** MALDI-TOF mass spectra of the tryptic digest mixture of  $\beta$ -casein and BSA (molar ratio 1:10) after enrichment with (a) the  $\text{Fe}_3\text{O}_4$ /PDA/PAMA-Arg nanospheres, (b)  $\text{Fe}_3\text{O}_4$ /PEI/Arg nanospheres, and (c) the commercial  $\text{TiO}_2$  microspheres, respectively. (s, monophosphopeptide; m, multiphosphopeptide; #, dephosphorylated peptide).

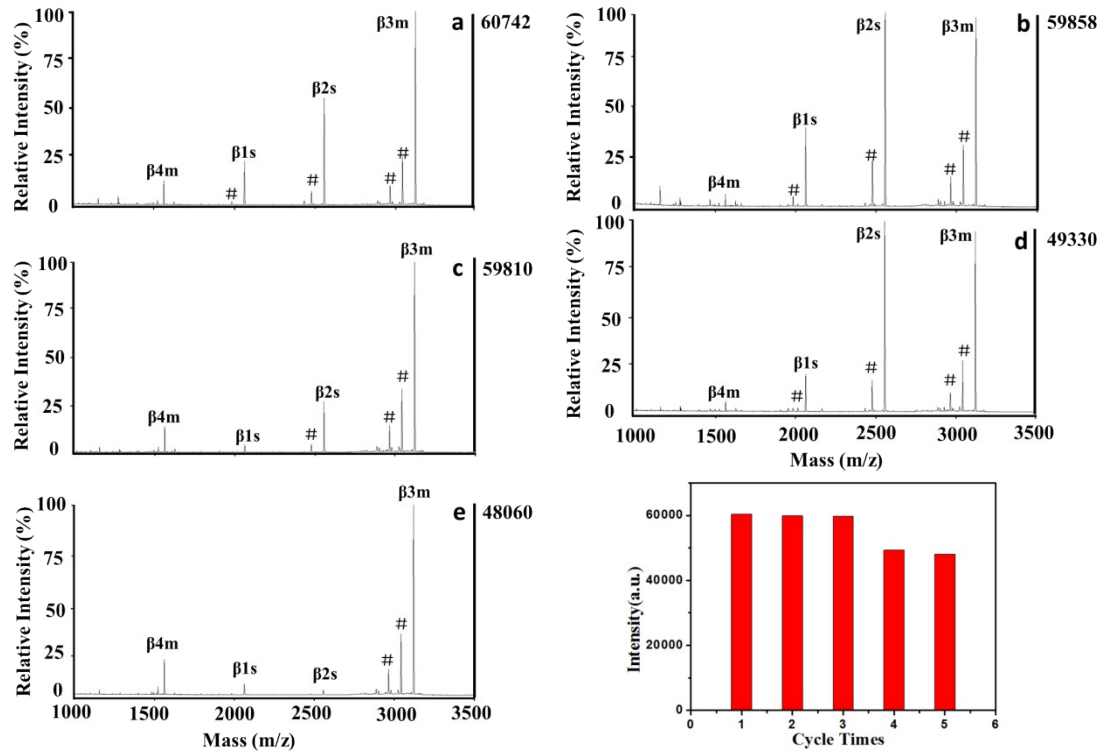

**Fig. S2** MALDI mass spectra of  $\beta$ -casein digest ( $10^{-6}$  M) after enrichment with the  $\text{Fe}_3\text{O}_4$ @PDA@PAMA-Arg nanospheres in 50% ACN, 0.1 M HAC. Cycling 1st (a), cycling 2nd (b), cycling 3rd (c), cycling 4th (d), and cycling 5th (e). (s, monophosphopeptide; m, multiposphopeptide; #, dephosphorylated peptide).

**Table S1.** List of phosphopeptides from tryptic digests of proteins extracted from non-fat milk after enrichment by  $\text{Fe}_3\text{O}_4$ @PDA@PAMA-Arg nanospheres in MALDI-TOF MS analysis. S: phosphorylated site.

| No. | Observed m/z | Theoretical m/z | Number of phosphoryl groups | Peptide sequence                             | Reported reference |
|-----|--------------|-----------------|-----------------------------|----------------------------------------------|--------------------|
| 1   | 1159.8       | 1162.5          | 1                           | RINKKIEKFQSEEQQTEDELQDKIHPPAQTQS             | 3                  |
| 2   | 1281.6       | 1281.1          | 1                           | KKIEKFQSEEQQTEDELQDKIHPPAQTQS                | 3                  |
| 3   | 1495.2       | 1495.0          | 2                           | RFFVAPFPEVFGKEKVNELS<br>KDIGSESTEDQAMEDIKQME | 3                  |
| 4   | 1561.8       | 1562.0          | 4                           | RELEELNVPGEIVESLSSSEESITRI                   | 3                  |
| 5   | 1660.2       | 1660.8          | 1                           | VPQLEIVPNSAEER                               | 1 2 3 4 5          |
| 6   | 1951.8       | 1951.9          | 1                           | YKVPQLEIVPNSAEER                             | 1                  |
| 7   | 2061.7       | 2061.8          | 1                           | FQSEEQQTEDELQDK                              | 1 2 3 4 5          |
| 8   | 2556.8       | 2556.2          | 1                           | FQSEEQQTEDELQDKIHPP                          | 1 2 3 4 5          |
| 9   | 2703.7       | 2703.5          | 5                           | QMEAESLSSSEIIVPNSVEAQ                        | 1 4                |
| 10  | 2935.0       | 2935.2          | 3                           | EKVNELSKDIGSESTEDQAMEDIK                     | 2 4 5              |
| 11  | 2964.7       | 2965.8          | 4                           | ELEELNVPGEIVESLSSSEESITR                     | 1                  |
| 12  | 3008.8       | 3008.0          | 4                           | NANEEEYSIGSSSEESAEVATEEVK                    | 1 2 3 5            |
| 13  | 3121.7       | 3122.3          | 4                           | RELEELNVPGEIVESLSSSEESITR                    | 1 2 3 4 5          |
| 14  | 3180.1       | 3180.7          | 4                           | RELEELNVPGEIVESLSSSEESIT                     | 2                  |

**Table S2.** Detailed information of the observed phosphopeptides obtained from tryptic digests of rat brain lysate.

| Master Protein<br>Accessions | Phospho (STY) Probabilities                            | Theoretical<br>m/z |
|------------------------------|--------------------------------------------------------|--------------------|
| A0A096MIT7_RAT               | LS(1)PQGQQVSPQSGSPQQQR                                 | 2133.0563          |
| A0A096MJN4_RAT               | IY(0.004)QFPDCDS(0.996)DEDEDFKLQDQALK                  | 2818.228           |
| A0A096MJN4_RAT               | LDPY(0.041)DS(0.732)S(0.228)EDDK                       | 1282.5201          |
| A0A096MJN4_RAT               | LDPY(0.48)DS(0.523)S(0.523)EDDKEY(0.473)VGFATLPNQVHR   | 2894.3359          |
| A0A096MJX5_RAT               | VGDTEKPEPERS(1)PPNR                                    | 1806.886           |
| A0A096MKC0_RAT               | WRPHS(1)PDGPR                                          | 1203.5897          |
| A0A0A0MP77_RAT               | RS(0.201)S(0.799)FLNAK                                 | 921.50321          |
| A0A0A0MXW9_RAT               | DVYLS(1)PR                                             | 848.43922          |
| A0A0A0MY13_RAT               | T(0.005)EVC PWES(0.227)HGQS(0.769)PLEDENR              | 2268.9706          |
| A0A0G2JSH4_RAT               | IQAAAS(1)PPANATAASDTNAGDR                              | 2068.9774          |
| A0A0G2JSU4_RAT               | T(0.004)AS(0.996)LTSAASIDGSR                           | 1335.663           |
| A0A0G2JSU4_RAT               | T(0.838)AS(0.162)LTSAASIDGSR                           | 1335.663           |
| A0A0G2JT93_RAT               | RT(0.024)S(0.975)MGGTQQQFVEGVR                         | 1779.8686          |
| A0A0G2JTF2_RAT               | LPS(1)PTPENK                                           | 981.51311          |
| A0A0G2JT17_RAT               | GDDDEES(1)DEEAVKK                                      | 1564.6377          |
| A0A0G2JTL7_RAT               | GVAPADS(1)PDAPR                                        | 1151.5571          |
| A0A0G2JTW5_RAT               | T(0.095)PDAS(0.905)PEPK                                | 940.45018          |
| A0A0G2JU89_RAT               | ELAS(1)PVSPELR                                         | 1196.6401          |
| A0A0G2JU89_RAT               | HVTLPS(0.041)S(0.959)PR                                | 992.54033          |
| A0A0G2JUG7_RAT               | LQHS(0.004)T(0.058)S(0.938)VLR                         | 1039.5774          |
| A0A0G2JV78_RAT               | ENADDS(1)DAETQDHSR                                     | 1688.651           |
| A0A0G2JVM6_RAT               | QAAQAT(0.871)GS(0.874)PHT(0.237)S(0.016)PT(0.003)HGGGR | 1816.8565          |
| A0A0G2JVM6_RAT               | QAAQAT(0.871)GS(0.874)PHT(0.237)S(0.016)PT(0.003)HGGGR | 1816.8565          |
| A0A0G2JVV5_RAT               | VNQPNANDKNS(1)PPK                                      | 1649.8121          |
| A0A0G2JVW5_RAT               | GS(0.027)GT(0.946)AS(0.027)DDEFENLR                    | 1496.6379          |
| A0A0G2JW28_RAT               | SSDTSQAVIT(0.5)T(0.5)PPPPSMPHK                         | 2077.015           |
| A0A0G2JW28_RAT               | SSDTSQAVIT(0.5)T(0.5)PPPPSMPHK                         | 2077.015           |
| A0A0G2JW65_RAT               | FS(0.165)S(0.835)PPPLAVSR                              | 1156.6241          |
| A0A0G2JW80_RAT               | EGS(1)QGELTPANSQSR                                     | 1559.7176          |
| A0A0G2JW85_RAT               | YGS(1)QEHPIGDK                                         | 1229.5677          |
| A0A0G2JW88_RAT               | ELPPS(1)PEKK                                           | 1023.5601          |
| A0A0G2JW88_RAT               | ES(0.191)EGS(0.767)PDT(0.042)DAAPGPDVDVTLTK            | 2201.9812          |
| A0A0G2JW88_RAT               | AAVGLTGNDIAT(1)PPNK                                    | 1537.81            |
| A0A0G2JW92_RAT               | VAILT(1)DDEEEQKR                                       | 1544.7682          |
| A0A0G2JWE3_RAT               | EDSEVQNES(1)DGHADR                                     | 1686.6717          |
| A0A0G2JWE3_RAT               | GLHS(0.001)S(0.033)DS(0.966)EEEEPKR                    | 1598.7172          |
| A0A0G2JWE3_RAT               | QKIDS(1)DDDGEKEGDEK                                    | 1806.7755          |
| A0A0G2JWK2_RAT               | AETSESSGSAPAVPEAS(0.161)AS(0.839)PK                    | 1958.9069          |
| A0A0G2JWK2_RAT               | EHHHHHHHAES(1)PK                                       | 1618.725           |
| A0A0G2JWM2_RAT               | EHANIDAQSGSQASNPS(0.005)AT(0.03)VS(0.965)PR            | 2323.0789          |

|                |                                                               |           |
|----------------|---------------------------------------------------------------|-----------|
| A0A0G2JWP1_RAT | GQGT(0.233)LQHS(0.767)PVGPA PASIER                            | 1957.997  |
| A0A0G2JX65_RAT | SFT(1)RAS(1)T(1)LR                                            | 1037.5618 |
| A0A0G2JX65_RAT | SFT(1)RAS(1)T(1)LR                                            | 1037.5618 |
| A0A0G2JX65_RAT | SFT(1)RAS(1)T(1)LR                                            | 1037.5618 |
| A0A0G2JX77_RAT | AGNES(1)PVQELR                                                | 1198.5942 |
| A0A0G2JX77_RAT | VS(0.846)PS(0.146)PS(0.007)QESLSSSK                           | 1418.6889 |
| A0A0G2JXZ3_RAT | Y(0.013)VES(0.986)DDEKPT(0.001)DENVNEK                        | 2009.8702 |
| A0A0G2JYC7_RAT | VPSAS(0.02)DS(0.905)DS(0.074)R                                | 1019.452  |
| A0A0G2JYN0_RAT | VHGH(1)DEEEEEEQPR                                             | 1805.7452 |
| A0A0G2JYR4_RAT | VEGIEGS(1)PAEEAR                                              | 1342.6365 |
| A0A0G2JZ27_RAT | LPDEEPS(1)PK                                                  | 1010.492  |
| A0A0G2JZ27_RAT | S(0.003)IQT(0.175)S(0.775)PT(0.047)EEDR                       | 1261.5786 |
| A0A0G2JZ56_RAT | AS(1)PCLDR                                                    | 817.37524 |
| A0A0G2JZ56_RAT | KT(0.134)S(0.866)LVIVESTDDQPQVFEK                             | 2162.1107 |
| A0A0G2JZ88_RAT | RDES(1)DEEPPRVER                                              | 1612.7441 |
| A0A0G2JZB4_RAT | DGLAPEKT(0.144)S(0.856)PDREK                                  | 1541.7686 |
| A0A0G2JZB4_RAT | DGLAPEKT(0.828)S(0.172)PDREK                                  | 1541.7686 |
| A0A0G2JZF2_RAT | IGFPS(0.001)T(0.016)S(0.983)PAK                               | 1003.5338 |
| A0A0G2JZF2_RAT | VLLLEANRHS(1)PGPER                                            | 1686.9166 |
| A0A0G2JZK7_RAT | GIS(1)ALLNQGDGDRK                                             | 1555.8318 |
| A0A0G2JZR0_RAT | LRPVS(1)PEEIR                                                 | 1194.6721 |
| A0A0G2JZX5_RAT | AQNPAYFEGKPAS(1)LDEGAMAGAR                                    | 2350.1012 |
| A0A0G2K079_RAT | RQS(1)LGGFLK                                                  | 1004.5767 |
| A0A0G2K0E5_RAT | FYGGGGGGGS(1)PGK                                              | 1096.4938 |
| A0A0G2K0M8_RAT | AAFS(0.987)KDES(0.013)KEPIVEVR                                | 1803.9367 |
| A0A0G2K0M8_RAT | DES(1)KEPIVEVR                                                | 1299.667  |
| A0A0G2K0M8_RAT | GVTAS(0.001)S(0.003)S(0.199)S(0.687)PPAS(0.11)VPK             | 1370.7042 |
| A0A0G2K0M8_RAT | NPTEAATAPAS(1)PK                                              | 1253.6252 |
| A0A0G2K0S7_RAT | KQELANS(0.02)S(0.059)DVT(0.263)LPDRPLS(0.65)PPLT(0.008)APPTMK | 3002.5747 |
| A0A0G2K0X9_RAT | VAQS(0.012)DGEES(0.988)PAEEGQLLGER                            | 2099.9607 |
| A0A0G2K104_RAT | RLDEQPPTLS(1)PK                                               | 1508.7835 |
| A0A0G2K1J5_RAT | AQLEPVAS(1)PAK                                                | 1109.6081 |
| A0A0G2K1J5_RAT | NDESQLS(0.999)PAT(0.001)R                                     | 1216.5684 |
| A0A0G2K1L8_RAT | ET(0.01)PAAS(0.971)EAPS(0.013)S(0.005)AAK                     | 1315.6256 |
| A0A0G2K1P1_RAT | S(0.454)PS(0.546)GGEHAPSEDSGK                                 | 1440.6117 |
| A0A0G2K1Q9_RAT | LST(0.005)S(0.995)PVR                                         | 758.42865 |
| A0A0G2K1Q9_RAT | QLEYQQFEDDKLS(1)QK                                            | 1897.9058 |
| A0A0G2K1Q9_RAT | KAEEAT(1)PVAALR                                               | 1254.6932 |
| A0A0G2K1Q9_RAT | VISQTNLIT(0.008)T(0.038)VT(0.954)PEKK                         | 1771.0091 |
| A0A0G2K285_RAT | APSQA AES(0.029)S(0.867)PT(0.105)K                            | 1172.5673 |
| A0A0G2K2M8_RAT | SADVS(0.995)PT(0.004)T(0.001)EGVK                             | 1189.5826 |
| A0A0G2K2M9_RAT | DKFS(0.948)PT(0.022)QDRPES(0.01)S(0.01)T(0.01)VLK             | 1933.9745 |
| A0A0G2K2M9_RAT | ELS(0.011)HS(0.989)PPR                                        | 921.46683 |

|                |                                                            |           |
|----------------|------------------------------------------------------------|-----------|
| A0A0G2K2M9_RAT | RQPS(0.992)PQPS(0.008)PR                                   | 1148.6051 |
| A0A0G2K2M9_RAT | VPS(0.999)PT(0.001)PVPK                                    | 920.53312 |
| A0A0G2K2M9_RAT | S(0.999)PVPS(0.001)AFSDQSR                                 | 1276.6048 |
| A0A0G2K2T6_RAT | RPMEEDGEKES(1)PSK                                          | 1617.7305 |
| A0A0G2K376_RAT | DHS(0.095)PT(0.855)PS(0.018)VFNS(0.031)DEER                | 1715.7387 |
| A0A0G2K382_RAT | LDS(0.433)S(0.567)PVLSPGNK                                 | 1212.635  |
| A0A0G2K3F4_RAT | AS(1)PEAEEAAR                                              | 1029.4727 |
| A0A0G2K3N1_RAT | ADAPDAGAS(0.822)DS(0.178)ELPSYHQNDVSLDR                    | 2757.2114 |
| A0A0G2K3S6_RAT | LAS(0.035)DDRPS(0.965)PPR                                  | 1209.6102 |
| A0A0G2K451_RAT | QDEMD(1)DDDLDDKPSPIK                                       | 2190.9111 |
| A0A0G2K4J8_RAT | DHLS(0.642)PDFY(0.096)DES(0.131)ET(0.131)DPGAEELPAR        | 2589.1143 |
| A0A0G2K4U8_RAT | AGS(0.085)RLS(0.915)AEDR                                   | 1060.5261 |
| A0A0G2K508_RAT | FQEQC(1)PEPTR                                              | 1700.7464 |
| A0A0G2K5A4_RAT | VFKEEGS(1)PDR                                              | 1162.5619 |
| A0A0G2K5C0_RAT | KFS(1)PSQVPVQTR                                            | 1372.7463 |
| A0A0G2K5E7_RAT | AKPAMPQDS(0.002)VPS(0.998)PR                               | 1479.7504 |
| A0A0G2K5Q0_RAT | HPPVLT(1)PPDQEVIR                                          | 1596.8624 |
| A0A0G2K5T1_RAT | APVHFVEPLS(0.994)PT(0.006)GVPGHR                           | 1896.0006 |
| A0A0G2K5V4_RAT | LQNIADAS(1)PEKR                                            | 1340.7048 |
| A0A0G2K611_RAT | DVEMGNS(1)VIEENEMK                                         | 1722.7441 |
| A0A0G2K613_RAT | GDVTAEEAAGAS(1)PAK                                         | 1372.647  |
| A0A0G2K613_RAT | AAAT(1)PESQEPQAK                                           | 1326.6416 |
| A0A0G2K613_RAT | GEVAPKET(1)PKK                                             | 1182.6608 |
| A0A0G2K654_RAT | S(0.841)ET(0.159)APAAPAAAPPAEK                             | 1477.7413 |
| A0A0G2K670_RAT | MYPES(0.003)T(0.012)T(0.058)GS(0.927)PAR                   | 1295.5816 |
| A0A0G2K613_RAT | DMLAS(1)DEEEEPSKVEK                                        | 1834.8142 |
| A0A0G2K615_RAT | GFS(1)EEQLR                                                | 964.46141 |
| A0A0G2K6Q5_RAT | EEQT(0.009)DT(0.02)S(0.95)DGES(0.02)VT(0.001)HHIR          | 1939.8508 |
| A0A0G2K700_RAT | KRDS(0.064)DS(0.936)DADEAT(0.91)PT(0.05)T(0.031)T(0.008)PR | 1961.8926 |
| A0A0G2K700_RAT | KRDS(0.064)DS(0.936)DADEAT(0.91)PT(0.05)T(0.031)T(0.008)PR | 1961.8926 |
| A0A0G2K774_RAT | EGS(1)PLKEESLAR                                            | 1314.6779 |
| A0A0G2K7H2_RAT | APSPVVS(0.996)PT(0.004)ELSK                                | 1310.7082 |
| A0A0G2K7H2_RAT | QSNVEDS(1)PEK                                              | 1131.5044 |
| A0A0G2K7T5_RAT | GFS(1)PPHR                                                 | 796.39802 |
| A0A0G2K7X3_RAT | ATVTPS(1)PVK                                               | 898.51238 |
| A0A0G2K7X3_RAT | EEDEEAES(1)PPEKK                                           | 1515.6577 |
| A0A0G2K7X3_RAT | EKT(1)PS(1)PKEEDEEAESPPEK                                  | 2154.9805 |
| A0A0G2K7X3_RAT | TSAS(1)PPLEK                                               | 928.48656 |
| A0A0G2K7X3_RAT | NSQEDS(1)EDS(1)EEKDVK                                      | 1737.7177 |
| A0A0G2K7X3_RAT | NSQEDS(1)EDS(1)EEKDVK                                      | 1737.7177 |
| A0A0G2K7X3_RAT | EKT(1)PS(1)PKEEDEEAESPPEK                                  | 2154.9805 |
| A0A0G2K808_RAT | LLHEDLDES(1)DDDVDEK                                        | 1885.8065 |
| A0A0G2K847_RAT | LDPPPS(1)PHANR                                             | 1199.6047 |

|                |                                                              |           |
|----------------|--------------------------------------------------------------|-----------|
| A0A0G2K8Y5_RAT | EMGT(1)PLADTPTRPVTR                                          | 1740.8829 |
| A0A0G2K904_RAT | DGQDAIAQS(1)PEK                                              | 1257.5837 |
| A0A0G2K9A9_RAT | RHS(0.905)T(0.094)EGEEGDVVS(0.001)DVGSR                      | 1815.7983 |
| A0A0G2K9C8_RAT | QS(0.107)S(0.785)T(0.107)ADAPELR                             | 1173.5626 |
| A0A0G2K9J0_RAT | EY(0.023)PS(0.97)PPPS(0.008)PLR                              | 1238.6295 |
| A0A0G2K9J0_RAT | FS(1)PPVVGQGGK                                               | 1069.5556 |
| A0A0G2K9J0_RAT | IPESELGS(0.992)PT(0.008)LTSAQK                               | 1656.857  |
| A0A0G2K9L2_RAT | AAET(0.004)VPDLPS(0.821)PPT(0.175)EAPAPASNTSNR               | 2489.2034 |
| A0A0G2K9Q6_RAT | S(0.113)GS(0.887)FQGA VR                                     | 907.45118 |
| A0A0G2K9S4_RAT | AIS(1)PTSATSSGR                                              | 1133.5677 |
| A0A0G2KA27_RAT | KRS(0.988)PT(0.011)ENVNT(0.001)PVGK                          | 1525.8213 |
| A0A0G2KA95_RAT | SLES(1)DNEEK                                                 | 1049.4513 |
| A0A0G2KAH9_RAT | RDS(1)VLAASR                                                 | 973.53049 |
| A0A0G2KAJ5_RAT | LSGS(1)PEHFQK                                                | 1128.5564 |
| A0A0G2KAL4_RAT | RDS(0.997)ET(0.003)EVEELR                                    | 1361.6423 |
| A0A0G2KAL4_RAT | VVSS(0.002)T(0.213)S(0.785)EEEEAFTEK                         | 1670.7523 |
| A0A0G2KAL9_RAT | NDSIVT(0.02)PS(0.98)PPQAR                                    | 1380.6997 |
| A0A0G2KAT5_RAT | LQPQEIS(0.999)PPPT(0.001)ANLDR                               | 1774.9214 |
| A0A0G2KAV8_RAT | LQTHDES(0.009)S(0.009)LPLQPS(0.982)PFMPR                     | 2276.126  |
| A0A0G2KAV8_RAT | MERPS(0.002)IS(0.006)VIS(0.896)PT(0.076)S(0.02)PGALK         | 1869.003  |
| A0A0G2KAV8_RAT | VS(1)PPESPR                                                  | 867.44503 |
| A0A0G2KAV8_RAT | VS(0.104)PPES(0.896)PR                                       | 867.44503 |
| A0A0G2KAV8_RAT | QGS(0.339)PT(0.641)QS(0.02)PPADTSFGSR                        | 1718.786  |
| A0A0G2KBA8_RAT | AHS(0.973)PAEGAS(0.008)T(0.011)DS(0.003)S(0.003)S(0.001)PGPK | 1681.7544 |
| A0A0G2QC53_RAT | GIDPPQVLS(1)PDMVPPSER                                        | 1932.9615 |
| A0A0G2QC53_RAT | TVFAGAVPVL PAS(1)PPPK                                        | 1646.9396 |
| A0A0H2UHA0_RAT | EQES(0.5)S(0.5)GEEDNDLSPEER                                  | 1948.777  |
| A0A0H2UHA0_RAT | EQES(0.5)S(0.5)GEEDNDLSPEER                                  | 1948.777  |
| A0A0H2UHB7_RAT | KGS(0.068)LDS(0.931)DNDDEKDPQHS(0.001)LNATHHADK              | 2873.2812 |
| A0A0H2UHB7_RAT | MFS(0.001)NPDNGS(0.999)PAMTHR                                | 1660.7086 |
| A0A0H2UHB7_RAT | NLTS(0.005)S(0.007)S(0.983)LNDIS(0.005)DKPEK                 | 1746.8636 |
| A0A0H2UHQ3_RAT | ANS(1)QDSLASR                                                | 1047.4945 |
| A0A0H2UHQ3_RAT | KPPPPAS(0.839)PGS(0.064)S(0.064)DS(0.017)S(0.017)AR          | 1536.7532 |
| A0A0H2UHZ1_RAT | S(0.792)QVET(0.208)EDLILKPGVVHVIDIDR                         | 2474.3381 |
| A0A0H2UHZ2_RAT | EFITGDVEPTDAES(0.005)AWHS(0.995)ENEEDDK                      | 2849.1788 |
| A0A0H2UHZ4_RAT | EES(1)DGEYDEFGR                                              | 1431.5426 |
| A0A0H2UI34_RAT | VQDNHLS(1)PNK                                                | 1150.5731 |
| A0A0U1RRP4_RAT | AHS(1)PQGEGEIPLHR                                            | 1526.759  |
| A0A0U1RRV0_RAT | VES(1)PPAAR                                                  | 825.43447 |
| A0A0U1RRZ5_RAT | FSDEEDGRDS(1)DEEGAEGHK                                       | 2107.8203 |
| A0A0U1RRZ5_RAT | EGPEPPEEV PAPT(0.037)T(0.963)PPAPK                           | 1938.9575 |
| A0A0U1RS39_RAT | AISAPT(0.001)S(0.982)PT(0.017)R                              | 999.53491 |
| A0A140TA95_RAT | AAT(0.002)EALGEKS(0.948)PEGT(0.041)T(0.009)VSGYDIMK          | 2354.1312 |

|                |                                                                                 |           |
|----------------|---------------------------------------------------------------------------------|-----------|
| A0A140TAB2_RAT | GEGEEDHES(0.998)PS(0.001)SGR                                                    | 1471.5811 |
| A0A140TAG3_RAT | ANLS(1)PDR                                                                      | 771.38752 |
| A0A140TAI3_RAT | NEKS(1)EEEQSSASVK                                                               | 1550.706  |
| A0A140UHX6_RAT | VLDT(0.046)PLS(0.944)EGDEPT(0.008)T(0.002)LPAQR                                 | 2038.0219 |
| A0A173DW41_RAT | VGHDS(1)ELENQDKK                                                                | 1497.7059 |
| A0A1B0GWY5_RAT | EAQELGS(1)PEDR                                                                  | 1229.5524 |
| A0A1B0GWY5_RAT | LS(1)PPHSPR                                                                     | 889.477   |
| A0A1K0FUA6_RAT | VVAGVAS(1)ALAHK                                                                 | 1121.6557 |
| A0A1L5YJQ7_RAT | HNPQS(1)PLQDSSATLK                                                              | 1621.806  |
| A0A1W2Q6I6_RAT | LIS(0.032)GDAEPT(0.968)PEQEEK                                                   | 1641.7734 |
| A0A1W2Q6Q2_RAT | AQPAPPELNS(0.01)ES(0.023)EDY(0.001)S(0.805)PS(0.132)S(0.023)S(0.004)ET(0.001)VR | 2576.1514 |
| A0A1W2Q6Q2_RAT | IS(0.002)QHGG(0.708)S(0.22)T(0.069)S(0.002)LSSTK                                | 1475.7216 |
| A0JN25_RAT     | TDHGAEIVY(0.988)KS(0.995)PVVS(0.012)GDT(0.003)S(0.003)PR                        | 2214.0917 |
| A0JN25_RAT     | S(0.003)PVVS(0.996)GDT(0.001)SPR                                                | 1100.5462 |
| A0JN25_RAT     | SPVVS(0.019)GDT(0.077)S(0.904)PR                                                | 1100.5462 |
| A0JN25_RAT     | TDHGAEIVY(0.067)KS(0.773)PVVS(0.773)GDT(0.693)S(0.693)PR                        | 2214.0917 |
| A0JN25_RAT     | T(1)PPGSGEPPK                                                                   | 965.48181 |
| A0JN25_RAT     | TDHGAEIVY(0.988)KS(0.995)PVVS(0.012)GDT(0.003)S(0.003)PR                        | 2214.0917 |
| GYS1_RAT       | HSS(0.988)PHQS(0.011)EDEEEPR                                                    | 1662.687  |
| GYS1_RAT       | HSSPHQS(1)EDEEEPR                                                               | 1662.687  |
| A7BJV7_RAT     | NTADHDES(1)PPR                                                                  | 1237.5323 |
| TM163_RAT      | S(1)PPPGVPRPPR                                                                  | 1309.7255 |
| B0BMV8_RAT     | LIEQPELAS(1)K                                                                   | 1126.6234 |
| B0K014_RAT     | SASSGAEGDVS(0.905)S(0.095)EREP                                                  | 1563.6649 |
| STK24_RAT      | AHS(0.999)PVQS(0.001)GLPGMQTLK                                                  | 1649.8559 |
| B1H266_RAT     | FNFES(0.001)VPES(0.999)PGEK                                                     | 1465.6725 |
| B1VKB4_RAT     | VASLS(1)PAR                                                                     | 799.4552  |
| B1WBR5_RAT     | HQPAAS(1)PVVVR                                                                  | 1159.6462 |
| B1WBR5_RAT     | S(1)PPPAKPR                                                                     | 961.5709  |
| B1WC16_RAT     | KAEGEPQEES(1)PLK                                                                | 1440.7096 |
| B1WC16_RAT     | ELFDY(0.005)S(0.995)PPLHK                                                       | 1344.6714 |
| B1WC16_RAT     | KEVQS(1)PEQVK                                                                   | 1170.6245 |
| B1WC16_RAT     | IDIS(1)PSALR                                                                    | 970.54475 |
| B1WC16_RAT     | YSPS(0.001)QNS(0.998)PIHHIPSR                                                   | 1718.8489 |
| PTSS2_RAT      | VAGSGS(0.008)ES(0.992)PLLEGR                                                    | 1414.7052 |
| B2GV41_RAT     | EREADEDS(1)EPER                                                                 | 1460.6015 |
| B2GV74_RAT     | KLDEDAS(1)PNEEKGDVPK                                                            | 1869.8956 |
| B2GV74_RAT     | VDS(0.999)PT(0.001)VNTTLR                                                       | 1201.6303 |
| B2RYA6_RAT     | IAAPELHKGDS(0.818)DS(0.182)EEDEPAK                                              | 2136.9811 |
| B2RYB3_RAT     | APQTS(0.05)S(0.949)PPPVR                                                        | 1135.5986 |
| B2RYB3_RAT     | EKS(1)PELPEPSVR                                                                 | 1366.7092 |
| B2RYB3_RAT     | HRPS(0.84)S(0.16)PATPPPK                                                        | 1270.6782 |
| B2RYB3_RAT     | KVELS(0.874)ES(0.126)EEDKGSK                                                    | 1563.7628 |

|            |                                               |           |
|------------|-----------------------------------------------|-----------|
| B2RYB3_RAT | LSPS(0.01)AS(0.989)PPR                        | 910.48723 |
| B2RYB3_RAT | RRT(1)PS(1)PPPR                               | 1062.6047 |
| B2RYB3_RAT | RY(0.001)S(0.999)PIQR                         | 1015.5563 |
| B2RYB3_RAT | S(0.008)VS(0.109)GS(0.87)PEPT(0.012)AK        | 1058.5244 |
| B2RYB3_RAT | VSVS(1)PGR                                    | 700.38679 |
| B2RYB3_RAT | RRT(1)PS(1)PPPR                               | 1062.6047 |
| B2RZ23_RAT | RPS(0.97)S(0.03)PAPGPSR                       | 1107.5785 |
| B2RZ73_RAT | AEETET(0.006)AS(0.146)S(0.848)PPEKDR          | 1645.7431 |
| B2RZ79_RAT | ELS(1)APAR                                    | 742.39735 |
| P5I11_RAT  | KHS(1)QTDLVSR                                 | 1169.6153 |
| B4F772_RAT | CHAEHT(1)PEEEDHTGAK                           | 1959.8381 |
| B4F7E7_RAT | NLGLAS(1)PEEHPK                               | 1290.6568 |
| B5DEI5_RAT | AVS(1)PEGDER                                  | 958.43559 |
| B5DEI5_RAT | DVINRS(0.985)PT(0.015)QLGK                    | 1326.7256 |
| B5DEX2_RAT | KEEHT(1)LLEK                                  | 1254.6456 |
| SNPH_RAT   | RT(0.128)S(0.872)PPVSVR                       | 997.56688 |
| SNPH_RAT   | EEGT(0.936)GES(0.007)AGGS(0.057)PAR           | 1303.564  |
| SNPH_RAT   | QAGDPS(0.005)NT(0.995)PAEDR                   | 1356.5906 |
| SNPH_RAT   | RT(0.5)S(0.5)PPVSVR                           | 997.56688 |
| EIF3C_RAT  | QPLLS(1)EDEEDTKR                              | 1671.8315 |
| B5DFI3_RAT | AIEQADLLQEEDES(1)PR                           | 1841.8643 |
| B5DFK6_RAT | HS(0.004)S(0.619)LPT(0.378)ES(1)DEDIAPAQR     | 1851.8599 |
| B5DFK6_RAT | HS(0.004)S(0.619)LPT(0.378)ES(1)DEDIAPAQR     | 1851.8599 |
| B5DFK6_RAT | S(1)PEKEGVPGVEK                               | 1254.6456 |
| B5DFK6_RAT | HS(0.004)S(0.018)LPT(0.529)ES(0.449)DEDIAPAQR | 1851.8599 |
| B5DFL0_RAT | QPS(0.234)S(0.766)PGPQPR                      | 1049.5254 |
| C6L8E0_RAT | LS(0.006)S(0.994)PVLHR                        | 907.52395 |
| D3Z8W6_RAT | EEHGAQAGPAS(0.005)APAS(0.015)APAQGS(0.98)PFR  | 2290.0727 |
| D3Z9C0_RAT | GFSQYGVVS(0.004)GS(0.85)PT(0.146)K            | 1313.6252 |
| D3Z9C7_RAT | EKPELVDDL(1)PR                                | 1396.7198 |
| D3Z9C7_RAT | HSWHDEDETFDES(1)PELK                          | 2214.8978 |
| D3Z9C7_RAT | IS(1)PEKPQDQK                                 | 1296.6674 |
| D3Z9C7_RAT | TPPSNLS(0.002)PIEDAS(0.835)PT(0.163)EELR      | 2052.0011 |
| D3Z9C7_RAT | IVDSGVQT(1)DDEETADR                           | 1748.7701 |
| D3Z9I0_RAT | VVT(0.003)MAEPGAAS(0.997)PPPPAR               | 1646.845  |
| D3ZA84_RAT | LDEGT(1)PPEPK                                 | 1081.5292 |
| D3ZAG3_RAT | ESPGGCIS(0.991)PGS(0.009)QEK                  | 1431.63   |
| D3ZAU7_RAT | APPDS(0.964)PT(0.029)T(0.007)PVR              | 1136.5826 |
| D3ZAY8_RAT | EAGVVHS(1)DAEKDQEEEEQK                        | 2155.9505 |
| TUTLB_RAT  | APS(0.003)ES(0.164)S(0.832)DDQGQPAAK          | 1486.6536 |
| D3ZB78_RAT | FT(1)PPAFIRPTR                                | 1301.7244 |
| D3ZBC7_RAT | LAGLGPEDDPDT(1)DDEQEPR                        | 2067.8869 |
| H15_RAT    | SETAPAET(0.002)TAPAPVEKS(0.998)PAK            | 1981.0004 |



|            |                                                                    |           |
|------------|--------------------------------------------------------------------|-----------|
| D3ZBU7_RAT | DKS(1)PSEGDVAPPKR                                                  | 1481.7474 |
| D3ZBU7_RAT | DKS(0.98)PS(0.02)EGDVTTPPKR                                        | 1511.758  |
| D3ZC55_RAT | ETAPTSAYS(0.173)S(0.827)PAR                                        | 1336.6259 |
| D3ZC56_RAT | LLDPEDVDVS(0.5)S(0.5)PDEK                                          | 1656.773  |
| D3ZC56_RAT | LLDPEDVDVS(0.5)S(0.5)PDEK                                          | 1656.773  |
| D3ZCL8_RAT | EYEEIHS(1)LK                                                       | 1275.5983 |
| D3ZCL8_RAT | LPS(1)PTK                                                          | 641.37483 |
| D3ZCZ3_RAT | VTGNPEDSCAS(0.002)EAPGS(0.171)S(0.827)PK                           | 1888.8109 |
| D3ZD80_RAT | ADEPS(0.386)S(0.614)PAEEKDEGGGK                                    | 1701.733  |
| D3ZDT1_RAT | ASQPGPTAES(0.011)QS(0.738)S(0.251)PHR                              | 1635.7601 |
| D3ZDT1_RAT | ASQPGPTAESQS(0.224)S(0.776)PHR                                     | 1635.7601 |
| D3ZDU2_RAT | ILD(0.001)S(0.001)S(0.001)LT(0.001)QS(0.001)APAS(0.851)PT(0.145)NK | 1829.9371 |
| D3ZE17_RAT | VPLPGGS(1)PEVK                                                     | 1175.655  |
| D3ZE14_RAT | DKDS(0.037)S(0.963)EPDENPATEPR                                     | 1785.7653 |
| D3ZE14_RAT | QNS(1)LEYMDQNDNR                                                   | 1626.658  |
| D3ZE16_RAT | MNT(0.001)APS(0.172)RPS(0.682)PT(0.145)R                           | 1313.651  |
| D3ZEL0_RAT | YTEQDRS(1)PR                                                       | 1150.5367 |
| D3ZET9_RAT | AES(1)PPADAK                                                       | 884.42396 |
| D3ZET9_RAT | HDDGTQS(1)DSENAGVHR                                                | 1723.7146 |
| D3ZF45_RAT | RPS(1)PPAAGK                                                       | 879.49265 |
| PRRT2_RAT  | HPS(0.812)S(0.188)QLAGPGVEGEGTQKPR                                 | 2088.0348 |
| D3ZFD0_RAT | FSHNY(0.001)LS(0.019)DS(0.902)DT(0.078)EAK                         | 1612.7005 |
| D3ZFD0_RAT | S(0.018)LAPDLS(0.982)DDEHDPVDSISRPR                                | 2320.0931 |
| D3ZG19_RAT | ES(0.604)S(0.396)PFINSTDTEK                                        | 1453.6573 |
| D3ZG19_RAT | NKGPS(1)PVSEGIK                                                    | 1298.683  |
| D3ZGN7_RAT | GPSQVS(0.125)S(0.769)PS(0.107)QPPQK                                | 1422.7103 |
| D3ZGN7_RAT | GRS(0.999)EEELEAS(0.001)K                                          | 1233.5837 |
| D3ZH78_RAT | AVAT(0.094)S(0.899)PS(0.007)LEAPK                                  | 1169.6292 |
| D3ZIL9_RAT | RPGPEHS(0.001)JGLEKES(0.999)DEEPED                                 | 2249.0084 |
| D3ZJG4_RAT | ANS(1)LDNER                                                        | 917.42027 |
| D3ZJR6_RAT | VAS(1)PANVGTLHTLSR                                                 | 1521.8263 |
| D3ZJU5_RAT | NEEPVR(1)PER                                                       | 1211.5895 |
| D3ZKQ4_RAT | NIS(0.838)LS(0.707)S(0.455)EEEAEGLAGHPR                            | 1894.9021 |
| D3ZKQ4_RAT | NIS(0.136)LS(0.941)S(0.923)EEEAEGLAGHPR                            | 1894.9021 |
| D3ZKQ4_RAT | NIS(0.136)LS(0.941)S(0.923)EEEAEGLAGHPR                            | 1894.9021 |
| D3ZKX8_RAT | T(0.066)S(0.066)ES(0.519)S(0.349)EEVPEEEPEKR                       | 1860.8225 |
| D3ZL24_RAT | KGSEVTAS(0.014)S(0.013)AAT(0.01)GT(0.054)S(0.909)PR                | 1720.8228 |
| D3ZMI4_RAT | APES(0.975)DT(0.025)GDEDQDQER                                      | 1690.6554 |
| D3ZMI4_RAT | DKS(1)DS(0.995)ET(0.005)EGLVFAR                                    | 1552.7369 |
| D3ZMI4_RAT | DKS(1)DS(0.995)ET(0.005)EGLVFAR                                    | 1552.7369 |
| D3ZMI4_RAT | EDDAES(1)GGRRS(1)EAEEGEVR                                          | 2076.8944 |
| D3ZMI4_RAT | S(1)EAEEGEVR                                                       | 1004.4411 |
| D3ZMI4_RAT | ET(0.044)DPS(0.956)PEER                                            | 1058.4516 |

|            |                                        |           |
|------------|----------------------------------------|-----------|
| D3ZMI4_RAT | FRYS(1)GR                              | 784.39802 |
| D3ZMI4_RAT | GACS(0.5)T(0.5)PELPQFESVK              | 1648.7767 |
| D3ZMI4_RAT | GPSSQEDES GGIEDS(1)PDR                 | 1860.761  |
| D3ZMI4_RAT | GT(0.421)VS(0.579)PPAVEPETEDR          | 1582.7475 |
| D3ZMI4_RAT | LPSSPAS(0.006)PS(0.994)PK              | 1066.5659 |
| D3ZMI4_RAT | LVS(1)PEPPPK                           | 962.54368 |
| D3ZMI4_RAT | APESDT(1)GDEDQDQER                     | 1690.6554 |
| D3ZMI4_RAT | ELKPEQET(0.069)T(0.931)PR              | 1326.6779 |
| D3ZMI4_RAT | GACS(0.5)T(0.5)PELPQFESVK              | 1648.7767 |
| D3ZMI4_RAT | GT(0.5)VS(0.5)PPAVEPETEDR              | 1582.7475 |
| D3ZMI4_RAT | RSEAEEGEVRT(1)PTK                      | 1587.7853 |
| D3ZMS5_RAT | ES(0.009)DILS(0.991)DEEEDFHHLK         | 2038.912  |
| D3ZMX6_RAT | GLGPPS(1)PPAPPR                        | 1141.6244 |
| D3ZMX6_RAT | GPAGEAS(0.001)AS(0.999)PPVR            | 1194.5993 |
| D3ZNK1_RAT | HGAGGIS(1)PAGQEV DANLQK                | 1847.9126 |
| D3ZNU3_RAT | VQS(1)LAQNPR                           | 1011.5461 |
| D3ZPH3_RAT | HAELS(0.006)GS(0.994)PLK               | 1037.5506 |
| D3ZPJ0_RAT | LVSQEHL LLS(0.17)S(0.83)PEALR          | 1790.989  |
| D3ZPN3_RAT | LAIQGPEDS(0.855)PS(0.145)R             | 1268.6361 |
| D3ZQI7_RAT | RAT(1)PEPEEAGGR                        | 1268.6109 |
| D3ZQL7_RAT | AANKT(1)PPKS(1)PGDPAK                  | 1477.7889 |
| D3ZQL7_RAT | AVS(0.016)S(0.983)PT(0.001)VSR         | 902.48214 |
| D3ZQL7_RAT | AANKT(1)PPKS(1)PGDPAK                  | 1477.7889 |
| D3ZRC3_RAT | LNHS(1)PPQSSSR                         | 1208.5898 |
| D3ZS76_RAT | DARPAS(1)PAGIPK                        | 1178.6408 |
| PI51A_RAT  | IPLKPS(0.998)PT(0.002)K                | 979.60662 |
| D3ZSY8_RAT | HGAS(0.003)AAPS(0.997)PPPR             | 1143.5785 |
| D3ZSZ4_RAT | ELLGLEDES(1)PAH                        | 1308.6198 |
| D3ZT07_RAT | FGIHVY(0.001)QFPECDS(0.999)DEDEDFKQQDR | 3003.2617 |
| D3ZT07_RAT | LAT(1)PEDKQDIDK                        | 1371.6882 |
| D3ZT71_RAT | S(0.989)HT(0.011)GEAIAAR               | 1011.5098 |
| D3ZTF0_RAT | RPPVVVNLS(0.002)T(0.053)S(0.945)PR     | 1420.815  |
| D3ZTF0_RAT | VALAAGS(0.989)PT(0.011)RPPPAR          | 1459.8259 |
| D3ZTF0_RAT | VPQSLTT(0.004)APAS(0.995)PPVLQR        | 1760.9785 |
| D3ZTF1_RAT | MLGEDS(1)DEEDEDTTAGK                   | 1911.7528 |
| D3ZU55_RAT | EGS(1)PIPHDPDLGSK                      | 1447.6943 |
| D3ZUW0_RAT | IS(0.008)NS(0.899)S(0.091)EFS(0.002)AK | 1068.5088 |
| D3ZVQ0_RAT | GTGLQPGEELPDIAPPLVT(1)PDEPK            | 2598.3065 |
| D3ZWA1_RAT | VTAS(1)PELAEEAAGR                      | 1341.6888 |
| D3ZWH2_RAT | EFS(1)PSFQHR                           | 1133.5254 |
| D3ZWL6_RAT | DGGEALVS(1)PDGTVTEAPR                  | 1769.8432 |
| D3ZWQ0_RAT | GLAS(0.054)S(0.946)PPGGALRPR           | 1334.7419 |
| D3ZX42_RAT | GVSEDET(1)DEEKETLK                     | 1693.753  |

|            |                                                         |           |
|------------|---------------------------------------------------------|-----------|
| D3ZXY2_RAT | EET(0.011)QPLS(0.542)HS(0.447)PK                        | 1251.6095 |
| D3ZYS1_RAT | HS(0.009)APS(0.063)PPVS(0.831)VGS(0.096)EEPHS(0.001)VLK | 2177.0865 |
| D3ZYW8_RAT | ALDPAPLAQPT(0.003)PVG(0.003)VQT(0.482)S(0.513)PELEHR    | 2609.3449 |
| D3ZZ99_RAT | AAVVT(0.07)S(0.93)PPPTTAPHK                             | 1472.7987 |
| D3ZZ99_RAT | EKS(0.878)PPDQS(0.121)AVPNTPPSTPVK                      | 2075.0535 |
| D3ZZ99_RAT | EKS(0.325)PPDQS(0.657)AVPNT(0.016)PPS(0.001)TPVK        | 2075.0535 |
| D3ZZ99_RAT | GDDASEEGQNGS(0.064)S(0.936)PK                           | 1476.5965 |
| D3ZZ99_RAT | GS(1)EENLDETR                                           | 1148.4946 |
| D3ZZ99_RAT | AAVVT(0.5)S(0.5)PPPTTAPHK                               | 1472.7987 |
| D3ZZ99_RAT | SPPDQS(0.002)AVPNT(0.918)PPS(0.049)T(0.031)PVK          | 1817.9159 |
| D3ZZ99_RAT | SPGT(1)PAGEGSGSPPK                                      | 1324.6259 |
| D3ZZQ0_RAT | QNS(1)DPTSENPLPTR                                       | 1651.7802 |
| D3ZZQ0_RAT | S(0.002)EGS(0.998)PVLPEPSK                              | 1362.6779 |
| D4A0A1_RAT | DSDAES(0.004)DAGKKES(0.993)DDDS(0.004)RPPHR             | 2413.0378 |
| D4A0H1_RAT | KEVRY(1)GS(1)LK                                         | 1078.6135 |
| D4A0H1_RAT | KEVRY(1)GS(1)LK                                         | 1078.6135 |
| D4A0I5_RAT | ATT(0.012)S(0.001)AS(0.003)AS(0.965)PT(0.018)LR         | 1161.599  |
| D4A0X3_RAT | KPGGDLPLHS(0.045)AS(0.952)DDET(0.003)PR                 | 1947.9286 |
| D4A148_RAT | KGS(0.951)PELQT(0.049)VHSWPGDR                          | 1792.8856 |
| D4A1G8_RAT | EIHDVAGDGDS(0.332)JLGS(0.628)PGPT(0.04)R                | 1878.8708 |
| D4A1G8_RAT | HEDGT(0.003)QS(0.994)DS(0.003)EDPLAK                    | 1627.6962 |
| D4A1G8_RAT | VVQT(0.029)S(0.968)PS(0.003)AR                          | 943.50869 |
| D4A1M4_RAT | LVS(1)GET(0.667)GGT(0.667)VT(0.667)IR                   | 1288.6987 |
| D4A3C2_RAT | TVT(0.001)VIS(0.999)PEDEQK                              | 1344.6773 |
| D4A3T0_RAT | RPESAPAES(0.033)S(0.951)PS(0.016)K                      | 1341.6525 |
| D4A404_RAT | S(0.067)HS(0.815)S(0.117)PSLNPDASPVTAK                  | 1693.8271 |
| D4A404_RAT | SHSSPSLNPDAS(0.987)PVT(0.013)AK                         | 1693.8271 |
| D4A463_RAT | RPS(1)APMAR                                             | 884.46506 |
| D4A4M0_RAT | ETIS(0.012)AIDT(0.072)S(0.915)PKENT(0.001)PVR           | 1856.948  |
| D4A4M0_RAT | LHSQDPLLS(1)PER                                         | 1390.7205 |
| D4A4W6_RAT | VLHGAQT(0.053)S(0.947)DEEKDF                            | 1574.7213 |
| D4A4X4_RAT | ELS(1)IQIDDER                                           | 1216.5935 |
| D4A510_RAT | KRS(0.919)PS(0.381)PS(0.7)PTPEAK                        | 1380.7361 |
| D4A510_RAT | S(0.005)PS(0.995)PSPTPEAK                               | 1096.5401 |
| D4A510_RAT | KRS(0.919)PS(0.381)PS(0.7)PTPEAK                        | 1380.7361 |
| D4A559_RAT | ECS(0.004)LS(0.996)PK                                   | 819.37965 |
| D4A559_RAT | KGAEDEDEDDDS(1)EEEEIK                                   | 2237.8819 |
| D4A5J1_RAT | ASAESEAS(1)PPSLR                                        | 1428.6845 |
| D4A626_RAT | IKES(0.998)PS(0.002)EQESR                               | 1288.6259 |
| BIG1_RAT   | VETEQS(1)PPHGEAK                                        | 1535.758  |

|            |                                                                           |           |
|------------|---------------------------------------------------------------------------|-----------|
| D4A644_RAT | KPGAGGS(1)PALVR                                                           | 1108.6353 |
| D4A6H8_RAT | HIS(1)PVQALSEFK                                                           | 1354.7245 |
| D4A6H8_RAT | TPEELEDSD(1)DFEQEDYDVR                                                    | 2329.9346 |
| D4A720_RAT | S(0.899)GS(0.101)HIGSR                                                    | 775.41882 |
| D4A8G7_RAT | GPPS(1)PPAPVMHSPSR                                                        | 1512.7507 |
| D4A8V2_RAT | YVLT(0.049)S(0.951)PR                                                     | 834.45995 |
| D4A997_RAT | AEDDGGES(0.997)EGDAS(0.003)EK                                             | 1494.5594 |
| D4A997_RAT | VFDDS(1)DEKEDEEDTDVR                                                      | 2041.8236 |
| D4AAZ8_RAT | KAS(1)PEPEGETAGK                                                          | 1299.6307 |
| D4ABI7_RAT | WLDES(1)DAEMELR                                                           | 1492.6504 |
| D4ABT8_RAT | AVEEQGDDQDS(1)EK                                                          | 1448.5903 |
| D4ABT8_RAT | S(1)GDETPGSEAPGDK                                                         | 1345.5634 |
| D4ABT8_RAT | SGDET(1)PGSEAPGDK                                                         | 1345.5634 |
| D4ABZ4_RAT | AAGGAAS(1)PGLGGAR                                                         | 1168.5949 |
| D4ACZ5_RAT | S(0.001)VT(0.001)S(0.003)NQS(0.003)DGT(0.003)QES(0.009)CES(0.981)PDVLDLDR | 2410.019  |
| D4AD03_RAT | DSGLEDDGGES(1)PSFDTPSQR                                                   | 1979.8345 |
| D4ADD3_RAT | S(0.376)HS(0.623)AGEVGEDS(0.001)R                                         | 1229.5273 |
| D4AE00_RAT | AFY(0.002)GS(0.998)EEDEAK                                                 | 1244.5197 |
| D4AE00_RAT | GPGS(1)EEAATAALPAR                                                        | 1396.6947 |
| D4AE69_RAT | AETET(0.963)S(0.037)PGHAPDR                                               | 1366.6113 |
| D4AE85_RAT | GT(0.002)GPPS(0.864)PT(0.134)KDR                                          | 1111.5622 |
| CAMP2_RAT  | FDGES(1)DKEQFDDQK                                                         | 1801.7279 |
| D4AEK9_RAT | LDQPVSAAPS(1)PR                                                           | 1262.6619 |
| D4AEL8_RAT | VAS(0.972)FS(0.548)KVS(0.267)S(0.213)EK                                   | 1167.6136 |
| D4AEL8_RAT | VAS(0.972)FS(0.548)KVS(0.267)S(0.213)EK                                   | 1167.6136 |
| E9PSJ4_RAT | NVST(0.002)DS(0.998)AENEK                                                 | 1321.5634 |
| E9PSJ4_RAT | GT(0.031)DT(0.969)PNKAEISK                                                | 1259.6357 |
| E9PSK7_RAT | LFS(0.017)S(0.043)S(0.026)S(0.083)S(0.831)PPPAK                           | 1203.6136 |
| E9PSN4_RAT | RS(1)PERPTGDLR                                                            | 1282.6742 |
| E9PST5_RAT | LQPEQES(1)PK                                                              | 1054.5295 |
| E9PST5_RAT | SSSFSEKGES(1)DDEKPR                                                       | 1912.8286 |
| E9PTU4_RAT | VIENT(0.002)DGS(0.998)EEEMDAR                                             | 1693.7101 |
| FILM19_RAT | HAFSPVASVES(0.772)AS(0.228)GEVLHSPK                                       | 2135.0647 |
| FILM19_RAT | HAFSPVASVES(0.068)AS(0.93)GEVLHS(0.003)PK                                 | 2135.0647 |
| FILM19_RAT | VLHAQCHS(0.002)T(0.01)PDS(0.988)AEDVRK                                    | 2048.9698 |
| FILM19_RAT | VLHAQCHS(0.023)T(0.969)PDS(0.009)AEDVR                                    | 1920.8748 |
| FILMD9_RAT | DPETGVDNT(0.263)S(0.737)PK                                                | 1258.5677 |
| FILMT8_RAT | AS(0.616)S(0.384)PQTEPLPR                                                 | 1181.6041 |
| FILMT8_RAT | GDFS(1)PFGNTQGPSR                                                         | 1465.6586 |
| FILMV8_RAT | LAAGAESPQPAS(0.539)GNS(0.432)PS(0.029)EDDR                                | 2054.9141 |
| FILMV8_RAT | LAAGAESPQPAS(0.001)GNS(0.997)PS(0.002)EDDR                                | 2054.9141 |
| FILMV8_RAT | KQET(1)PDEVGSQR                                                           | 1372.6583 |
| FILNB9_RAT | GTQADWES(1)PER                                                            | 1274.5527 |

|            |                                                                                       |           |
|------------|---------------------------------------------------------------------------------------|-----------|
| FILNB9_RAT | HMQMS(0.035)S(0.965)QEALNK                                                            | 1402.6333 |
| FILNB9_RAT | T(0.005)DGEAS(0.994)PLKEAET(0.001)KEEEEEVEK                                           | 2476.1341 |
| FILNK0_RAT | APHWTSASLTEAAAHPHS(1)PEMK                                                             | 2355.1066 |
| FILNK0_RAT | DGS(1)PDAPATPEK                                                                       | 1183.5357 |
| FILNK0_RAT | DKVTDGIT(0.001)KS(0.999)PEK                                                           | 1416.746  |
| FILNK0_RAT | EAS(1)PPSSADK                                                                         | 987.4509  |
| FILNK0_RAT | GNAQESLDT(0.019)VS(0.981)PK                                                           | 1344.6521 |
| FILNK0_RAT | KDDQS(1)PLDIK                                                                         | 1157.5928 |
| FILNK0_RAT | LDTVLEKS(1)EEHVDSK                                                                    | 1727.8578 |
| FILNK0_RAT | VDHGAEIIT(0.002)QS(0.978)PS(0.019)R                                                   | 1508.7583 |
| FILNK0_RAT | VT(0.003)S(0.997)EPEAVSEK                                                             | 1174.5717 |
| FILNK0_RAT | DGS(1)PDAPAT(1)PEKEEVPFSEYK                                                           | 2292.0434 |
| FILNK0_RAT | VTDGIT(0.827)KS(0.173)PEKR                                                            | 1329.7252 |
| FILNK0_RAT | ET(0.564)S(0.431)PET(0.005)S(0.001)LIQDEVALK                                          | 1758.8887 |
| FILNK0_RAT | IST(1)PERK                                                                            | 829.46577 |
| FILNK0_RAT | VAIIRT(1)PPK                                                                          | 993.6335  |
| FILNP8_RAT | AGIPQHPPMAQNLQY(0.029)PDDS(0.971)DDEKK                                                | 2830.2981 |
| FILNZ5_RAT | AAAAPSASSTPTVIAS(1)PK                                                                 | 1625.8625 |
| FILP57_RAT | LKIS(1)PEQHWDFTAEDLK                                                                  | 2056.0266 |
| FILPA3_RAT | AQAPELQEEERPGAVGS(1)PR                                                                | 2148.056  |
| FILPA3_RAT | VQT(0.581)PQS(0.419)PHQHPVAPGAVADK                                                    | 2063.0548 |
| FILPB9_RAT | WHQLQENHVS(0.219)S(0.781)D                                                            | 1592.6968 |
| FILPM3_RAT | RKS(1)EPAVGPPR                                                                        | 1192.6677 |
| FILPN6_RAT | AHS(1)PLLK                                                                            | 764.45447 |
| FILPQ1_RAT | Y(0.021)GLQDS(0.979)DEEEEHPPK                                                         | 1900.7963 |
| FILQN3_RAT | DKEDLVCS(0.069)AALHS(0.845)PQES(0.086)PVGK                                            | 2266.09   |
| FILQN3_RAT | LS(0.194)AS(0.77)PQELGKPY(0.033)LES(0.003)FQPNLHSTK                                   | 2670.3653 |
| FILQN3_RAT | RGS(0.712)GS(0.269)VDET(0.019)LFALPAASEPVPSSAEK                                       | 2714.3763 |
| FILQZ9_RAT | AQS(1)PLLPEPLK                                                                        | 1191.6863 |
| FILQZ9_RAT | GQS(1)PTAPGPPK                                                                        | 1035.5349 |
| FILQZ9_RAT | T(0.013)T(0.013)ES(0.954)PS(0.017)AT(0.002)KPDDKEQSK                                  | 1847.8749 |
| FILR60_RAT | APT(0.014)PGGGHPDS(0.986)PGLPAPAGQQQR                                                 | 2192.0723 |
| FILR60_RAT | QDIS(1)PTR                                                                            | 815.41373 |
| FILRA4_RAT | RQS(1)IPEEFK                                                                          | 1132.5877 |
| FILRI7_RAT | VGS(0.005)LT(0.994)PPS(0.232)S(0.769)PK                                               | 1068.5815 |
| FILRI7_RAT | VGS(0.003)LT(0.997)PPSSPK                                                             | 1068.5815 |
| FILRI7_RAT | VQT(0.155)T(0.845)PPPTIQGQK                                                           | 1393.7565 |
| FILRL9_RAT | AETEEAEPEEDGEDNVS(0.649)GS(0.137)AS(0.214)K                                           | 2407.9623 |
| FILRL9_RAT | ASAEGEATAVVS(0.002)PGVT(0.006)QAVVEHCAS(0.991)PEEK                                    | 3038.4139 |
| FILRL9_RAT | ATVVVEAT(0.061)EPEPS(0.061)GS(0.061)IGNPAAT(0.061)T(0.132)S(0.564)PS(0.048)LS(0.01)HR | 2961.468  |
| FILRL9_RAT | DVSDERLS(1)PAK                                                                        | 1215.6095 |
| FILRL9_RAT | SAGFIPIKEDFS(1)PEKK                                                                   | 1791.9407 |
| FILRL9_RAT | EVPSKEEQS(1)PVK                                                                       | 1355.6933 |

|            |                                                                                                        |           |
|------------|--------------------------------------------------------------------------------------------------------|-----------|
| FILRL9_RAT | ESVAS(1)GDDR                                                                                           | 934.3992  |
| FILRL9_RAT | HS(0.989)PT(0.011)EDEEIAK                                                                              | 1254.5728 |
| FILRL9_RAT | S(0.996)QGS(0.002)T(0.001)SNSDWMK                                                                      | 1326.551  |
| FILRL9_RAT | LGGDGS(1)PTQVDVSQFGSFK                                                                                 | 1924.9167 |
| FILRL9_RAT | MSISEGT(0.006)VS(0.994)DK                                                                              | 1152.5333 |
| FILRL9_RAT | QPGVQS(1)PSR                                                                                           | 954.48829 |
| FILRL9_RAT | SDIS(1)PLTPR                                                                                           | 984.52401 |
| FILRL9_RAT | SLMS(0.02)S(0.98)PEDLTK                                                                                | 1206.5802 |
| FILRL9_RAT | SPSLSPS(0.018)PPS(0.982)PIEK                                                                           | 1421.7402 |
| FILRL9_RAT | SSISPMDEPVPS(0.003)ES(0.997)PIEK                                                                       | 2042.9354 |
| FILRL9_RAT | T(0.004)LEVVS(0.262)PS(0.291)QS(0.136)VT(0.169)GS(0.125)AGHT(0.14)PY(0.08)Y(0.074)QS(0.58)PT(0.138)DEK | 2964.3989 |
| FILRL9_RAT | VESKPS(0.998)VT(0.002)EK                                                                               | 1102.587  |
| FILRL9_RAT | VQSLEGEKLS(1)PK                                                                                        | 1313.7191 |
| FILRL9_RAT | AET(1)EEAEPEEDGEDNVSGSASK                                                                              | 2407.9623 |
| FILRL9_RAT | DLT(0.001)GQVS(0.03)T(0.97)PPVK                                                                        | 1240.6663 |
| FILRL9_RAT | T(1)PEDGGYSCEITEK                                                                                      | 1584.6614 |
| FILRV4_RAT | MQVDQEEPHT(0.092)EEQQPQT(0.908)PAENK                                                                   | 2592.1398 |
| FILRY7_RAT | APPGPLPPAAS(0.034)PGPPAAS(0.963)PPAAPS(0.001)S(0.001)PR                                                | 2411.2597 |
| FILRY7_RAT | DS(0.5)AS(0.5)PGAASGLDPLDSAR                                                                           | 1685.7857 |
| FILRY7_RAT | DS(0.15)AS(0.85)PGAASGLDPLDSAR                                                                         | 1685.7857 |
| FILRY7_RAT | GAASGPAAEEAGS(1)EEAGPAGEPR                                                                             | 2137.9512 |
| FILRY7_RAT | GEPQCS(1)PEGPAR                                                                                        | 1283.5564 |
| FILRZ1_RAT | EAAT(1)PEEEGGAPEK                                                                                      | 1413.626  |
| FILRZ7_RAT | EPLTEKPKDS(1)PGEAK                                                                                     | 1624.8308 |
| FILRZ7_RAT | S(1)PVKEEIKPPAEVK                                                                                      | 1549.8716 |
| FILRZ7_RAT | S(1)PVKEEAKS(1)PAEAK                                                                                   | 1469.7726 |
| FILRZ7_RAT | S(1)PAEAKS(1)PAEAKS(1)PAEAK                                                                            | 1767.9003 |
| FILRZ7_RAT | EEAKS(1)PEKEETR                                                                                        | 1431.6842 |
| FILRZ7_RAT | EEIKPPAEVKS(1)PEK                                                                                      | 1579.8457 |
| FILRZ7_RAT | S(1)PVVEVK                                                                                             | 786.41233 |
| FILRZ7_RAT | S(1)PEQVKS(1)PAKEEAK                                                                                   | 1526.794  |
| FILRZ7_RAT | SLAEAKS(1)PEK                                                                                          | 1058.5608 |
| FILRZ7_RAT | S(1)PAEAKS(1)PAEAKPPAEAK                                                                               | 1777.921  |
| FILRZ7_RAT | S(1)PAEAKPPAEAKS(1)PAEAK                                                                               | 1777.921  |
| FILRZ7_RAT | S(1)PAEAKS(1)PAEAKPPAEAK                                                                               | 1777.921  |
| FILRZ7_RAT | S(1)PAEAKS(1)PAEVK                                                                                     | 1212.635  |
| FILRZ7_RAT | S(1)PAEVKS(1)PAVAK                                                                                     | 1182.6608 |
| FILRZ7_RAT | S(1)PAEAKS(1)PAEVKS(0.957)PAT(0.043)VK                                                                 | 1795.968  |
| FILRZ7_RAT | S(1)PAEVKS(0.992)PAT(0.008)VK                                                                          | 1212.6714 |
| FILRZ7_RAT | SPAEVKS(1)PATVK                                                                                        | 1212.6714 |
| FILRZ7_RAT | S(1)PGEAKS(1)PAEAK                                                                                     | 1170.5881 |
| FILRZ7_RAT | S(1)PAEVKS(1)PVEAK                                                                                     | 1240.6663 |

|            |                                                            |           |
|------------|------------------------------------------------------------|-----------|
| FILRZ7_RAT | S(1)PAEVKS(1)PVEAK                                         | 1240.6663 |
| FILRZ7_RAT | S(1)PAEAKS(0.972)PAS(0.028)VK                              | 1170.6245 |
| FILRZ7_RAT | SPAFAKS(0.999)PAS(0.001)VK                                 | 1170.6245 |
| FILRZ7_RAT | S(1)PAEAKS(1)PVEVK                                         | 1240.6663 |
| FILRZ7_RAT | S(1)PVEVKS(0.994)PAS(0.006)VK                              | 1226.6871 |
| FILRZ7_RAT | S(1)PVEVKS(1)PEK                                           | 1098.5921 |
| FILRZ7_RAT | SPVEVKS(1)PEK                                              | 1098.5921 |
| FILRZ7_RAT | S(1)PAGAKS(1)PAEAK                                         | 1112.5826 |
| FILRZ7_RAT | S(1)PAEAKS(1)PVVAK                                         | 1182.6608 |
| FILRZ7_RAT | S(1)PAEVKS(1)PAEVKS(1)PAEAK                                | 1823.9629 |
| FILRZ7_RAT | S(1)PAEVKS(1)PAEVKS(1)PAEAK                                | 1823.9629 |
| FILRZ7_RAT | S(1)PAEVKS(1)PAEVKS(1)PAEAK                                | 1823.9629 |
| FILRZ7_RAT | S(0.871)PAEVKS(0.799)PAT(0.438)VKS(0.891)PVEAK             | 1823.9993 |
| FILRZ7_RAT | S(0.982)PAT(0.018)VKS(1)PVEAK                              | 1212.6714 |
| FILRZ7_RAT | SPATVKS(1)PVEAK                                            | 1212.6714 |
| FILRZ7_RAT | S(1)PAEVKS(1)PAVAK                                         | 1182.6608 |
| FILRZ7_RAT | S(1)PAEVKS(0.978)PVT(0.022)VK                              | 1240.7027 |
| FILRZ7_RAT | SPAFAKS(1)PVTVK                                            | 1240.7027 |
| FILRZ7_RAT | S(1)PASVKS(0.982)PS(0.018)EAK                              | 1186.6194 |
| FILRZ7_RAT | S(1)PASVKS(0.982)PS(0.018)EAK                              | 1186.6194 |
| FILRZ7_RAT | S(1)PEQVKS(1)PAKEEAK                                       | 1526.794  |
| FILRZ7_RAT | S(1)PGEAKS(1)PAEAK                                         | 1170.5881 |
| FILRZ7_RAT | S(1)PMKEEAKS(1)PEK                                         | 1359.6704 |
| FILRZ7_RAT | SPMKEEAKS(1)PEK                                            | 1359.6704 |
| FILRZ7_RAT | S(1)PVKEEAKS(1)PAEAK                                       | 1469.7726 |
| FILRZ7_RAT | TLDVKS(1)PEAK                                              | 1086.5921 |
| FILRZ7_RAT | S(0.686)PAEVKS(0.972)PAT(0.91)VKS(0.432)PVEAK              | 1823.9993 |
| FILS36_RAT | QPVELT(0.999)PT(0.001)DK                                   | 1126.587  |
| FILSD1_RAT | NVEPPS(0.881)PT(0.119)PAAR                                 | 1234.6306 |
| FILSE6_RAT | GEGPAIPGDT(0.998)PPPT(0.002)PR                             | 1557.7787 |
| VPS50_RAT  | SAYQDY(0.003)DS(0.844)DS(0.154)DVPEELKR                    | 2115.9233 |
| FILSL6_RAT | IMES(1)PERK                                                | 988.50117 |
| FILSL6_RAT | SDVET(0.017)AT(0.017)DS(0.959)DT(0.007)ESR                 | 1511.6223 |
| FILSM0_RAT | VS(0.002)DQNS(0.998)PVLPK                                  | 1182.6245 |
| FILT49_RAT | RES(1)GEGEEVADSAR                                          | 1619.7023 |
| FILUV9_RAT | HT(0.005)EPNET(0.687)T(0.285)PLT(0.022)EPEKGPVETK          | 2333.1387 |
| FILV89_RAT | S(0.002)ENS(0.532)S(0.366)T(0.366)QS(0.366)S(0.366)PEMPTTK | 1709.7414 |
| FILVK0_RAT | YT(0.001)AGS(0.142)AS(0.748)PT(0.107)PT(0.002)FK           | 1326.6456 |
| FILW91_RAT | AAQLQGS(1)PAPEK                                            | 1195.6197 |
| FILWN1_RAT | QS(0.018)GS(0.982)PENWR                                    | 1059.4734 |
| FILWT1_RAT | ETETMNQAT(1)PAR                                            | 1347.6089 |
| FILWX5_RAT | RPS(0.03)AS(0.156)S(0.814)PNNTAAK                          | 1299.6531 |
| FILXB6_RAT | VNSLCT(0.001)DDDS(0.999)PHK                                | 1486.6358 |

|            |                                                           |           |
|------------|-----------------------------------------------------------|-----------|
| FILXB6_RAT | VPS(1)KEDDKLEIDLEHLHR                                     | 2059.0334 |
| FILYA6_RAT | NMAPSQS(1)PVR                                             | 1213.5874 |
| FILZX5_RAT | T(0.001)EGT(0.999)PPPGQPAK                                | 1275.6459 |
| F1M062_RAT | ET(0.034)ES(0.965)APGSPR                                  | 1029.4727 |
| F1M0Z6_RAT | LELKPIDKS(1)PDPNPVMTDTPIPR                                | 2572.3571 |
| F1M1Y0_RAT | HVPS(1)PLNLEEVQK                                          | 1488.7936 |
| F1M1Y0_RAT | NLS(1)SEEVARPR                                            | 1256.6473 |
| F1M1Y0_RAT | T(0.21)GS(0.788)PLT(0.002)VATGNDQAATEAK                   | 1830.8959 |
| F1M1Y0_RAT | WVHFS(0.002)DAS(0.979)PEHVT(0.019)PELTPR                  | 2204.0651 |
| F1M1Y0_RAT | AT(1)PPPPPPPTYR                                           | 1289.6768 |
| F1M1Y0_RAT | AVPAT(1)PPR                                               | 807.46029 |
| F1M1Y0_RAT | RST(1)PTPELTSK                                            | 1215.6459 |
| F1M2J2_RAT | LS(0.58)S(0.42)PAQSPSQK                                   | 1128.5775 |
| F1M2K6_RAT | LYLQS(1)PR                                                | 875.4865  |
| F1M2K6_RAT | S(0.834)PS(0.166)IDSIQK                                   | 973.50803 |
| F1M2P8_RAT | VIS(1)PSEDR                                               | 901.45051 |
| F1M324_RAT | LS(0.001)S(0.013)NCS(0.071)GVEGDVT(0.915)DEDEGAEMSQR      | 2571.0337 |
| F1M392_RAT | ETDDIES(1)PKR                                             | 1188.5622 |
| F1M3W5_RAT | ESEAGTGS(0.932)S(0.068)EHEDGER                            | 1675.6558 |
| F1M3W5_RAT | ESEAGTGSSEHEDGEREGS(1)PR                                  | 2201.9057 |
| F1M3W5_RAT | FGDVEADS(1)PVEQTIQDHSFAFK                                 | 2432.1496 |
| F1M3W5_RAT | MKLDHEL(1)LDR                                             | 1355.6867 |
| F1M3W5_RAT | QLDHES(1)DDADREDDER                                       | 1943.7729 |
| F1M3W5_RAT | QLDHES(0.017)DDADREDDERS(0.983)QEER                       | 2573.0498 |
| F1M403_RAT | KEDKPEVQS(1)PVK                                           | 1382.7405 |
| F1M4A0_RAT | IDS(1)PGLK                                                | 728.40685 |
| F1M4A0_RAT | VQIPVS(0.006)HPDPDPVS(0.727)DNEDDS(0.209)Y(0.058)DEDVHDPR | 3287.4127 |
| F1M4A4_RAT | SGT(0.931)S(0.069)QEELR                                   | 1005.4727 |
| F1M4I1_RAT | T(0.006)PEELEDVS(0.994)DLEDDHEVR                          | 2125.9288 |
| F1M4W7_RAT | RPNEDS(1)DEDEEK                                           | 1461.5856 |
| F1M6X3_RAT | EPEPAPPY(0.002)HS(0.995)PES(0.003)R                       | 1706.7536 |
| F1M787_RAT | ALQS(1)PEHHIDPIYEDR                                       | 1918.9173 |
| F1M787_RAT | GGS(1)PLTTTQGGSPK                                         | 1387.6943 |
| F1M787_RAT | GGSPLTTTQGG(0.792)PT(0.208)K                              | 1387.6943 |
| F1M7S2_RAT | LS(0.032)S(0.968)PPR                                      | 655.36532 |
| F1M823_RAT | LLS(1)PGTSK                                               | 801.45962 |
| F1M836_RAT | VRPSSDLSNS(0.016)T(0.134)GQS(0.85)PHHK                    | 1932.9402 |
| F1M842_RAT | LTTSEEERS(1)PAK                                           | 1346.6678 |
| F1M8G9_RAT | DGS(1)KEPIVEMR                                            | 1259.618  |
| F1M8I7_RAT | VQRPEDAS(0.306)GGS(0.161)S(0.532)PS(0.001)GTSK            | 1745.818  |
| F1M8V2_RAT | LAGGQTSQPTTPLT(0.038)S(0.962)PQR                          | 1838.9486 |
| F1M9F9_RAT | NLS(0.014)IT(0.166)S(0.821)PPPGPAK                        | 1277.698  |
| F1M9G6_RAT | AS(0.113)DPQS(0.887)PPQVSR                                | 1267.6157 |



|            |                                                              |           |
|------------|--------------------------------------------------------------|-----------|
| F1M9G9_RAT | S(0.004)AS(0.996)EDSIR                                       | 863.39847 |
| F1M9G9_RAT | GKEDEGT(1)PIKEDIITDK                                         | 1886.9473 |
| F1M9N9_RAT | AEGFES(0.871)ES(0.129)EEGATKPK                               | 1694.7635 |
| F1M9N9_RAT | HS(1)PVFSGKPEK                                               | 1211.6299 |
| F1M9N9_RAT | DSLES(0.2)S(0.8)PVEPK                                        | 1186.5717 |
| F1M9N9_RAT | EIS(0.589)S(0.378)PS(0.026)S(0.007)PVK                       | 1029.5342 |
| F1M9N9_RAT | HLPVS(1)PGK                                                  | 833.47594 |
| F1M9N9_RAT | KGS(0.999)S(0.996)EES(0.005)VDEDR                            | 1336.5743 |
| F1M9N9_RAT | KGS(0.999)S(0.996)EES(0.005)VDEDR                            | 1336.5743 |
| F1M9N9_RAT | KGSSEES(1)VDEDR                                              | 1336.5743 |
| F1M9N9_RAT | QSDS(0.007)NAS(0.993)FLR                                     | 1123.5258 |
| F1M9N9_RAT | S(1)PQGLELPLHNR                                              | 1359.7259 |
| F1M9N9_RAT | TVDEQEDMDLQIS(1)PDRK                                         | 2017.9262 |
| F1M9N9_RAT | VET(0.996)PT(0.004)DIHSEK                                    | 1254.6092 |
| F1M9N9_RAT | RFT(1)PEEEMFK                                                | 1312.6122 |
| F1MA86_RAT | DTAS(0.006)LS(0.002)T(0.001)T(0.009)PS(0.19)ES(0.791)PR      | 1447.6791 |
| F1MA86_RAT | EVHDELEDLPS(0.999)PPPPLS(0.001)PPPTTSPHK                     | 2812.3919 |
| F1MA86_RAT | EVHDELEDLPS(0.998)PPPPLS(0.975)PPPT(0.009)T(0.009)S(0.01)PHK | 2812.3919 |
| TPR_RAT    | QTPQAPQS(1)PR                                                | 1108.5625 |
| F1MAL5_RAT | VT(0.01)S(0.966)PT(0.017)S(0.007)GLK                         | 888.49165 |
| F1SW39_RAT | EDTDQEEKAS(1)NEDVTK                                          | 1836.7861 |
| F1SW39_RAT | ET(0.298)S(0.701)VS(0.001)KEDTDQEEK                          | 1623.7112 |
| F1SW39_RAT | ET(0.004)S(0.106)VS(0.69)KEDT(0.2)DQEEK                      | 1623.7112 |
| F1SW39_RAT | ETSVSKEDT(1)DQEEK                                            | 1623.7112 |
| F2W8B0_RAT | AIY(0.002)QGPS(0.555)S(0.389)PDKS(0.054)                     | 1248.5986 |
| F7DLY1_RAT | YWGPAS(0.978)PT(0.022)HK                                     | 1142.5509 |
| F7F350_RAT | T(1)PPVVIK                                                   | 752.47963 |
| F7FKI5_RAT | YGMGT(0.134)S(0.866)VER                                      | 998.44913 |
| F7FKI5_RAT | YHGHS(0.991)MS(0.009)DPGVSYR                                 | 1591.6838 |
| F8WFH6_RAT | DLES(0.001)LS(0.999)PR                                       | 915.46616 |
| F8WFH6_RAT | DTDAYSDL(1)DGEK                                              | 1414.5736 |
| F8WFS9_RAT | AGT(0.943)KS(0.058)PAVS(0.802)PS(0.196)K                     | 1128.6139 |
| F8WFS9_RAT | DAATEEPGS(1)PVK                                              | 1199.567  |
| F8WFS9_RAT | GPGQMTNADT(0.004)DGDS(0.995)YKDK                             | 1999.8429 |
| F8WFS9_RAT | SEDTVPEAAS(0.999)PPPSQGQHYFDR                                | 2414.0775 |
| F8WFS9_RAT | VTMILQS(1)PSFR                                               | 1277.6802 |
| F8WFS9_RAT | AGT(0.943)KS(0.058)PAVS(0.802)PS(0.196)K                     | 1128.6139 |
| G3C8Z1_RAT | YKDDT(0.001)DS(0.997)PT(0.002)EDGEKPR                        | 1851.8123 |
| G3V6C3_RAT | GADS(1)GGEKEEGVNR                                            | 1403.6277 |
| G3V6M3_RAT | GGQDDDDAET(0.108)GLT(0.892)EGEGEGEEKEPENLGK                  | 3133.2967 |
| G3V6P7_RAT | KGTGDCS(1)DEEVDGK                                            | 1495.6097 |
| G3V6S0_RAT | AQTLPTSVVIT(0.001)S(0.004)ES(0.159)S(0.837)PGKR              | 2058.0957 |
| G3V6S0_RAT | ES(0.567)S(0.433)PVPSPTSDR                                   | 1257.5837 |

|            |                                                                         |           |
|------------|-------------------------------------------------------------------------|-----------|
| G3V6S0_RAT | ES(0.171)S(0.829)PVPSPTSDR                                              | 1257.5837 |
| G3V6S0_RAT | ESS(0.001)PVPS(0.955)PT(0.042)S(0.002)DR                                | 1257.5837 |
| G3V6S0_RAT | GDQVSQLPAEQGS(1)PR                                                      | 1738.8234 |
| G3V6S0_RAT | HDT(0.003)S(0.017)AS(0.153)T(0.604)QS(0.603)T(0.608)PAS(0.009)S(0.003)R | 1531.6863 |
| G3V6S0_RAT | RPPS(1)PEPSAK                                                           | 1064.5615 |
| G3V6S0_RAT | HDTAS(0.021)T(0.878)QS(0.094)T(0.008)PASSR                              | 1531.6863 |
| G3V6S0_RAT | HDTASTQS(0.066)T(0.934)PASSR                                            | 1531.6863 |
| G3V6Y9_RAT | KADIDQS(1)PVSK                                                          | 1186.6194 |
| G3V700_RAT | LGADES(1)EEEGR                                                          | 1190.5051 |
| G3V733_RAT | T(0.065)PALS(0.805)PQRPLT(0.065)T(0.065)QQPQS(0.001)GTLK                | 2248.2175 |
| G3V733_RAT | TPALS(0.089)PQRPLT(0.351)T(0.558)QQPQS(0.002)GTLK                       | 2248.2175 |
| G3V7G0_RAT | DFQEY(0.001)VEGEDFPAS(0.999)PQR                                         | 2109.928  |
| G3V7G0_RAT | KPASVSPTPPS(0.923)PT(0.07)EGEAS(0.006)                                  | 1838.8898 |
| G3V7G0_RAT | KPAS(0.003)VS(0.028)PT(0.159)T(0.799)PPS(0.814)PT(0.162)EGEAS(0.035)    | 1838.8898 |
| G3V7P8_RAT | RLS(1)GGAVPSASMTR                                                       | 1388.7194 |
| G3V7P8_RAT | LSGGAVPS(0.001)AS(0.426)MT(0.573)R                                      | 1232.6183 |
| G3V7S2_RAT | EKAEEEGGS(1)EEEVGDK                                                     | 1720.7275 |
| G3V7S2_RAT | AEEEGGSEEEVGDKS(1)PQESK                                                 | 2119.9029 |
| G3V7S2_RAT | AKS(1)PVPKS(1)PVVEVKPKPEAK                                              | 2144.2205 |
| G3V7S2_RAT | S(1)PVVEVKPKPEAK                                                        | 1436.7875 |
| G3V7S2_RAT | EEPEVEKS(1)PVKS(1)PEAK                                                  | 1910.9473 |
| G3V7S2_RAT | EEEEQETQEKG(1)GQEEEK                                                    | 2121.8822 |
| G3V7S2_RAT | SPVKS(1)PEAK                                                            | 941.5182  |
| G3V7S2_RAT | GVVTNGLDVS(1)PAEEK                                                      | 1513.7624 |
| G3V7S2_RAT | VSGS(1)PSSGFR                                                           | 979.47231 |
| G3V7T8_RAT | ERS(0.999)LDS(0.001)VDR                                                 | 1075.5258 |
| G3V7T8_RAT | HAS(1)EPQPGPR                                                           | 1074.5207 |
| G3V7U2_RAT | ADS(1)VEQQDGAALEK                                                       | 1459.6791 |
| G3V7U2_RAT | AEEEMEET(0.005)HPS(0.993)DEEGEET(0.002)K                                | 2317.938  |
| G3V7U2_RAT | ALGLEES(1)PAEGSK                                                        | 1286.6354 |
| G3V7U2_RAT | DFQEDS(1)WGETK                                                          | 1340.5521 |
| G3V7U2_RAT | DFQEDS(0.001)WGET(0.039)KHS(0.939)PGVS(0.021)K                          | 2032.9126 |
| G3V7U2_RAT | DKS(1)LELR                                                              | 859.47633 |
| G3V7U2_RAT | EDS(0.991)EEQT(0.009)VKPGPEEGTSEEGK                                     | 2260.9819 |
| G3V7U2_RAT | EAAAGCNT(0.063)S(0.937)AEK                                              | 1265.5194 |
| G3V7U2_RAT | EES(1)EAEVKEDVIEK                                                       | 1632.773  |
| G3V7U2_RAT | EGEGGAGAPDS(0.003)S(0.01)S(0.041)FS(0.946)PK                            | 1578.6798 |
| G3V7U2_RAT | EVVPDS(1)PGDK                                                           | 1041.4979 |
| G3V7U2_RAT | S(1)PEQEVV                                                              | 843.40865 |
| G3V7U2_RAT | ET(0.167)S(0.816)PT(0.017)RGEPVGGQK                                     | 1441.7161 |
| G3V7U2_RAT | GFKS(1)PPCEDFSVTGESEK                                                   | 1999.8833 |
| G3V7U2_RAT | GHWDDGTNDS(1)DLEK                                                       | 1587.6437 |
| G3V7U2_RAT | HTQEALKAS(1)PK                                                          | 1208.6513 |

|            |                                                                      |           |
|------------|----------------------------------------------------------------------|-----------|
| G3V7U2_RAT | MAS(1)PPSPGPPSAHTPFHQSPVEDK                                          | 2568.2067 |
| G3V7U2_RAT | QEPDPGPNVEPS(0.5)IT(0.5)PPAVPPR                                      | 2193.1066 |
| G3V7U2_RAT | SPFEIIS(0.991)PPAS(0.009)PPEMTGQR                                    | 2039.9986 |
| G3V7U2_RAT | TEATQGLDY(0.014)VPS(0.019)AGT(0.044)IS(0.913)PT(0.008)S(0.002)SLEEDK | 2695.2712 |
| G3V7U2_RAT | VPSAPQES(1)PVPDTESTAPMR                                              | 2152.0106 |
| G3V7U2_RAT | VRGES(0.857)S(0.143)EALK                                             | 1074.5669 |
| G3V7U2_RAT | WLAES(1)PVGLPPEEDKLTR                                                | 2165.1004 |
| G3V7U2_RAT | AELEEMEET(0.913)HPS(0.087)DEEGEETK                                   | 2317.938  |
| G3V7U2_RAT | ALALVPGT(0.975)PT(0.025)R                                            | 1094.6448 |
| G3V7U2_RAT | EDS(0.5)EEQT(0.5)VKPGPEEGTSEEGK                                      | 2260.9819 |
| G3V7U2_RAT | QEPDPGPNVEPS(0.048)IT(0.952)PPAVPPR                                  | 2193.1066 |
| G3V7X2_RAT | EHLGQGS(0.5)S(0.5)QEMEK                                              | 1458.6409 |
| G3V7X2_RAT | EHLGQGS(0.416)S(0.584)QEMEK                                          | 1458.6409 |
| G3V7X2_RAT | IETQTQEEVRDS(1)K                                                     | 1561.7584 |
| G3V7X2_RAT | VDEEQKLY(0.771)T(0.229)DDEDDVYK                                      | 2102.9168 |
| G3V849_RAT | AMGDEDS(0.977)GDS(0.023)DTSPKPSPK                                    | 1919.8055 |
| G3V849_RAT | AS(1)PDGSQTVR                                                        | 1016.4887 |
| G3V864_RAT | AVHT(0.031)S(0.966)PT(0.003)GGLGAR                                   | 1222.6418 |
| G3V8A5_RAT | PTTQQS(1)PQDEQEK                                                     | 1514.6849 |
| G3V8D6_RAT | REDS(1)PGPEVQPMDB                                                    | 1583.725  |
| G3V8E2_RAT | AAS(0.998)PPAS(0.002)ASDLIEQQQK                                      | 1739.869  |
| G3V8G4_RAT | ELET(0.012)PS(0.988)EEK                                              | 1060.4924 |
| G3V8G4_RAT | EVAGET(0.058)GS(0.941)PELS(0.001)GVPR                                | 1583.7791 |
| G3V8I4_RAT | QGDNIS(1)DDEDEV                                                      | 1490.6121 |
| G3V8K2_RAT | MKGET(1)PVNSTMSIGQAR                                                 | 1805.8764 |
| G3V8L3_RAT | LRLS(0.994)PS(0.005)PTSQR                                            | 1240.6888 |
| G3V8L9_RAT | ATEEPS(0.001)GT(0.072)GS(0.927)DELIK                                 | 1532.7206 |
| G3V8P6_RAT | AGDS(1)DESRPDDK                                                      | 1419.575  |
| G3V8P8_RAT | GS(0.754)PS(0.246)GLAPILR                                            | 1066.6135 |
| G3V8V4_RAT | LVEDERS(1)DR                                                         | 1117.5364 |
| G3V8W2_RAT | EDAPPEDKES(0.985)ES(0.015)EAK                                        | 1659.7112 |
| G3V8W2_RAT | LDGET(0.002)AS(0.998)DSESR                                           | 1265.5372 |
| G3V927_RAT | AMGDEDS(1)DESGGSPKPSPK                                               | 1946.8164 |
| G3V953_RAT | VEGT(0.01)EIVKPS(0.99)PK                                             | 1282.7133 |
| G3V984_RAT | EPELEMESLT(0.002)GS(0.998)PEDR                                       | 1817.7989 |
| G3V984_RAT | FS(1)PIEEAK                                                          | 919.4651  |
| G3V984_RAT | QASAT(0.01)APGRES(0.99)PR                                            | 1326.664  |
| G3V984_RAT | S(0.109)LS(0.891)DPKPLSPTAEESAK                                      | 1755.8891 |
| G3V984_RAT | IADSSVQT(1)DDEEGEGR                                                  | 1706.7231 |
| G3V9E4_RAT | ALDIS(0.059)AS(0.941)DDEMARPK                                        | 1617.7668 |
| G3V9G3_RAT | ES(0.255)S(0.721)DS(0.001)TNT(0.003)T(0.019)IEDEDAK                  | 1740.7174 |
| G3V9G3_RAT | ESS(0.001)DS(0.001)T(0.001)NT(0.014)T(0.982)IEDEDAK                  | 1740.7174 |
| G3V9U0_RAT | GWS(1)PPPEVR                                                         | 1023.5138 |

|            |                                                   |           |
|------------|---------------------------------------------------|-----------|
| G3V9W0_RAT | MS(1)PKPELTEEQK                                   | 1415.6966 |
| G3V9X2_RAT | VDLAGS(1)PDQEASGLPDP                              | 1822.8697 |
| G3V9Z6_RAT | IS(1)NAEPEPR                                      | 1011.4985 |
| I1T7F1_RAT | MHDSHLS(0.949)S(0.051)EEPK                        | 1395.6089 |
| I6L9H8_RAT | LGTGGGGS(1)PDK                                    | 944.45632 |
| I7FKL4_RAT | AS(1)QKRPS(1)QR                                   | 1056.5788 |
| I7FKL4_RAT | AS(1)QKRPS(1)QR                                   | 1056.5788 |
| I7FKL4_RAT | FS(1)WGAEGQKPGFGYGG                               | 1799.838  |
| I7FKL4_RAT | S(1)PLPSHAR                                       | 863.46135 |
| I7FKL4_RAT | HRDT(1)GILDSIGR                                   | 1338.7004 |
| M0R3R6_RAT | QPT(1)PPFFGR                                      | 1045.5345 |
| M0R3V7_RAT | GMIIEHEGDRPAS(1)K                                 | 1538.7511 |
| M0R3V7_RAT | GMIIEHEGDRPAS(0.427)KT(0.573)EIEMDGK              | 2442.1519 |
| M0R3Z8_RAT | HLDRS(1)PESDRPR                                   | 1463.7229 |
| M0R3Z8_RAT | LLLLERPS(1)PVR                                    | 1291.7976 |
| M0R4F8_RAT | FKERT(1)ER                                        | 964.50903 |
| M0R567_RAT | KAS(1)PEPPSAESALK                                 | 1525.7624 |
| M0R5I3_RAT | AEEAQT(1)DNEGE                                    | 1347.5539 |
| M0R5U4_RAT | GQGT(0.082)AS(0.914)PGS(0.004)VSDLAQTVK           | 1701.8533 |
| M0R5U4_RAT | QGDEES(0.999)ENS(0.001)VKR                        | 1376.6168 |
| M0R660_RAT | GAAQNIIPAS(0.284)T(0.716)GAAK                     | 1368.7361 |
| M0R6K4_RAT | NS(0.004)APAS(0.02)MS(0.955)PDGT(0.02)R           | 1289.567  |
| M0R7B4_RAT | S(0.5)ET(0.5)APAAPAAPAVEK                         | 1505.7726 |
| M0R7B4_RAT | S(0.5)ET(0.5)APAAPAAPAVEK                         | 1505.7726 |
| M0R8V0_RAT | DHNLGS(1)PPK                                      | 963.47739 |
| M0R920_RAT | S(0.952)PS(0.048)ESAEGTHTFEEK                     | 1634.706  |
| M0R961_RAT | VQIS(1)PDSGGLPER                                  | 1353.6888 |
| M0R9R3_RAT | ASQVKPGDS(1)LPR                                   | 1253.6728 |
| M0RA52_RAT | VVITQS(1)PGK                                      | 927.53893 |
| M0RBB2_RAT | EPS(1)LHEIGEK                                     | 1137.5666 |
| M0RBF0_RAT | APTAAPS(1)PEPR                                    | 1092.5564 |
| M0RBL8_RAT | EGKPEDEVEPEDEEKS(1)DEEEKPDKK                      | 2943.2993 |
| M0RBL8_RAT | GT(0.003)DDS(0.997)PKNSQEDLQDR                    | 1803.7871 |
| M0RC17_RAT | DET(0.004)FGHEY(0.019)S(0.735)DS(0.241)DEKPLK     | 1858.8109 |
| M0RDG0_RAT | AES(0.015)GDS(0.933)LS(0.041)S(0.011)EDR          | 1251.5215 |
| M0RDG0_RAT | DSSLS(0.001)APS(0.998)PKPGK                       | 1269.6565 |
| M0RDJ7_RAT | ADEKKS(1)DTEGKPAR                                 | 1517.6958 |
| M3ZCQ2_RAT | EEAS(1)DDDMEGDEAVVR                               | 1765.6949 |
| M9MMM9_RAT | LLDAEDVDVPS(1)PDEK                                | 1640.7781 |
| AMPH_RAT   | AALPAGEGES(1)PEGAK                                | 1382.6678 |
| SCG1_RAT   | EQS(0.082)S(0.916)QES(0.002)GEETR                 | 1365.5644 |
| SCG1_RAT   | EQSSQES(1)GEETR                                   | 1365.5644 |
| SCG1_RAT   | NHPDSELES(0.036)T(0.062)ANRHS(0.662)EET(0.24)EEER | 2595.1069 |

|            |                                                                     |           |
|------------|---------------------------------------------------------------------|-----------|
| SCG1_RAT   | VDNEEWTTGGGGHS(1)R                                                  | 1499.6389 |
| SCG1_RAT   | WWQEEQLEPEES(0.763)REEVS(0.237)FPDR                                 | 2832.2627 |
| NEB1_RAT   | DLTGGGDLT(0.056)S(0.944)PDASASSCGK                                  | 1894.8214 |
| NEB1_RAT   | RPS(0.991)PGEVS(0.009)K                                             | 955.50869 |
| AFAD_RAT   | YVLSSQHRPDIS(0.995)PT(0.005)ER                                      | 1883.949  |
| NSF1C_RAT  | KKS(1)PNELVDDLK                                                     | 1531.8246 |
| NSF1C_RAT  | RHS(1)GQDVHVVLK                                                     | 1373.7528 |
| NCKX2_RAT  | GGG(0.914)S(0.086)ASLHNSLMR                                         | 1315.6303 |
| NCKX2_RAT  | GGG(0.037)S(0.288)AS(0.674)LHNS(0.001)LMR                           | 1315.6303 |
| KCC1B_RAT  | HSHPGLGT(0.001)S(0.004)QS(0.995)PK                                  | 1331.6582 |
| O70368_RAT | MAGPPAPPGGS(1)PR                                                    | 1190.5866 |
| SGTA_RAT   | GPDR(1)PPSEEDSAEER                                                  | 1841.8028 |
| PNPO_RAT   | GLAT(0.575)GDS(0.425)PLGPMTHHGEEEDWVYER                             | 2653.1867 |
| O88953_RAT | GIMES(1)PIVR                                                        | 1000.5376 |
| O88953_RAT | T(0.039)Y(0.014)ET(0.695)PPPS(0.084)PGLDPT(0.084)FS(0.084)NQPVPDAVR | 2778.3501 |
| MDHC_RAT   | KLS(0.855)S(0.143)AMS(0.002)AAK                                     | 992.53247 |
| ALDOA_RAT  | GILAADES(0.869)T(0.126)GS(0.006)IAK                                 | 1331.6933 |
| ALDOA_RAT  | GILAADEST(0.002)GS(0.998)IAK                                        | 1331.6933 |
| AT1A1_RAT  | VDNS(0.057)S(0.203)LT(0.724)GES(0.015)EPQTR                         | 1618.7435 |
| AT1A2_RAT  | AGQENIS(0.982)VS(0.018)K                                            | 1031.5247 |
| AT1A2_RAT  | EDS(0.764)PQS(0.236)HVLVMK                                          | 1368.6708 |
| NEUM_RAT   | AGDAPS(1)EKKGEGDAAPSEEK                                             | 2100.9447 |
| NEUM_RAT   | EGDGS(0.968)AT(0.009)T(0.001)DAAPAT(0.005)S(0.017)PKAEPSK           | 2216.0081 |
| NEUM_RAT   | KEGDGSATDAAPAT(0.039)S(0.961)PK                                     | 1702.801  |
| NEUM_RAT   | IQAS(1)FR                                                           | 720.39187 |
| NEUM_RAT   | QADVPAAVT(0.685)DAAAT(0.12)T(0.195)PAAEDAAK                         | 2154.0441 |
| NEUM_RAT   | QADVPAAVT(0.029)DAAAT(0.226)T(0.746)PAAEDAAK                        | 2154.0441 |
| CXA1_RAT   | AS(0.28)S(0.72)RPRPDDLEI                                            | 1354.6841 |
| CXA1_RAT   | VAAGHELQPLAIVDQRPS(0.572)S(0.428)R                                  | 2143.1498 |
| CXA1_RAT   | VAAGHELQPLAIVDQRPS(0.5)S(0.5)R                                      | 2143.1498 |
| KAP0_RAT   | EDEIS(1)PPPPNPVVK                                                   | 1516.7773 |
| SYN1_RAT   | GS(0.535)HS(0.032)QT(0.34)PS(0.092)PGALPLGR                         | 1560.8009 |
| SYN1_RAT   | GSHS(0.002)QT(0.05)PS(0.948)PGALPLGR                                | 1560.8009 |
| CALM3_RAT  | MKDT(0.01)DS(0.99)EEEIR                                             | 1351.5926 |
| ACM2_RAT   | EPVANQDPVS(0.962)PS(0.038)LVQGR                                     | 1791.9115 |
| KCC2A_RAT  | ES(0.867)S(0.073)ES(0.058)T(0.002)NTTIEDTK                          | 1784.7436 |
| KCC2A_RAT  | ES(0.009)S(0.727)ES(0.203)T(0.079)NT(0.138)T(0.845)IEDEDTK          | 1784.7436 |
| KCC2A_RAT  | ESS(0.004)ES(0.001)TNT(0.021)T(0.973)IEDEDTK                        | 1784.7436 |
| KCC2G_RAT  | QS(0.53)S(0.412)APAS(0.058)PAASAAGLAGQAAK                           | 1810.9173 |
| KAP3_RAT   | RAS(0.996)VCAEAY(0.004)NPDEEEDDAESR                                 | 2411.9772 |
| STMN1_RAT  | ASGQAFELILS(1)PR                                                    | 1387.746  |
| STMN1_RAT  | DLS(1)LEEIQKK                                                       | 1201.6554 |
| STMN1_RAT  | ESVPEFPLS(1)PPK                                                     | 1325.6867 |

|           |                                                                  |           |
|-----------|------------------------------------------------------------------|-----------|
| STMN1_RAT | S(1)HEAEVLK                                                      | 911.47125 |
| KCC2D_RAT | ANVVT(0.01)S(0.99)PK                                             | 814.45487 |
| H14_RAT   | SETAPAAPAPAEKT(1)PIK                                             | 1917.0207 |
| NFL_RAT   | DEPPS(1)EGEAEEEEKEK                                              | 1830.7643 |
| NFL_RAT   | KEES(1)AGEEQAAK                                                  | 1275.5943 |
| NDKB_RAT  | VMLGET(1)NPADSKPGTIR                                             | 1784.9091 |
| SYT1_RAT  | DDDAET(0.001)GLT(0.999)DGEEKEEPK                                 | 1976.8335 |
| PGAM1_RAT | HGES(1)AWNLENR                                                   | 1311.5956 |
| KCNC1_RAT | LALS(0.012)DS(0.988)PDGRPGGFWR                                   | 1729.8536 |
| KCNC1_RAT | AALANEDCPHIDQALT(1)PDEGLPFTR                                     | 2750.297  |
| SL9A1_RAT | LDS(1)PTMSR                                                      | 905.42767 |
| ARRB1_RAT | DDKDEEDDGT(0.062)GS(0.938)PHLNNR                                 | 2012.8308 |
| MARCS_RAT | AEDGAAPS(0.972)PS(0.021)S(0.006)ETPKK                            | 1570.7475 |
| MARCS_RAT | EAAEAEPAPGS(0.803)PS(0.16)AET(0.038)EGASASSTSSPK                 | 2731.1944 |
| MARCS_RAT | GEAAAERPGEAAVASS(0.956)PS(0.044)K                                | 1783.8701 |
| MARCS_RAT | LSGFS(1)FKK                                                      | 912.5069  |
| MARCS_RAT | RFS(1)FKK                                                        | 811.47046 |
| MARCS_RAT | VNGDAS(1)PAAAEFGAK                                               | 1353.6525 |
| MARCS_RAT | AEDGAAPSPS(0.001)S(0.014)ET(0.985)PK                             | 1442.6525 |
| DLG4_RAT  | DWGS(0.001)S(0.011)S(0.067)GS(0.921)QGR                          | 1122.469  |
| DLG4_RAT  | EQLMNS(0.075)S(0.925)LGS(0.001)GTASLR                            | 1649.8043 |
| DLG4_RAT  | RYS(1)PVAK                                                       | 819.46029 |
| DLG4_RAT  | VHS(0.182)DS(0.789)ET(0.029)DDIGFIPSK                            | 1745.8108 |
| HS90B_RAT | EKEIS(1)DDEAEKEKGEK                                              | 1863.8222 |
| HS90B_RAT | IEDVGS(1)DEEDDS(1)GKDKK                                          | 1864.8174 |
| HS90B_RAT | IEDVGS(1)DEEDDS(1)GKDKK                                          | 1864.8174 |
| CDK4_RAT  | EVS(0.007)LRGAFS(0.993)PR                                        | 1314.7044 |
| PAK1_RAT  | DVAT(0.019)S(0.072)PIS(0.599)PT(0.308)ENNT(0.002)T(0.001)PPDALTR | 2296.1183 |
| CALX_RAT  | AEDEILNRS(1)PR                                                   | 1427.7005 |
| CALX_RAT  | QKS(0.985)DAEEDGGT(0.35)GS(0.664)QDEEDS(0.001)KPK                | 2335.9888 |
| CALX_RAT  | QKS(0.036)DAEEDGGT(0.128)GS(0.834)QDEEDS(0.001)KPK               | 2335.9888 |
| CALX_RAT  | SDAEEDGGT(0.973)GS(0.027)QDEEDSKPK                               | 2079.8352 |
| NOLC1_RAT | AGKES(1)EEEEEDTEQNKK                                             | 1978.8603 |
| GFAP_RAT  | MT(1)PPLPAR                                                      | 881.47931 |
| DPYL2_RAT | GLYDGPVCEVS(0.012)VT(0.988)PK                                    | 1619.7865 |
| MOT1_RAT  | DGKEDET(0.001)S(0.852)T(0.147)DVDEKPK                            | 1791.801  |
| CACB3_RAT | RS(1)PPPSLAK                                                     | 951.55016 |
| SC6A5_RAT | LS(0.402)S(0.598)PQAQATSAALR                                     | 1399.7419 |
| STX1B_RAT | DS(1)DDEEEVVHVDR                                                 | 1542.6434 |
| STXB1_RAT | LNKTDEEIS(0.5)S(0.5)                                             | 1134.5404 |
| STXB1_RAT | LNKTDEEIS(0.5)S(0.5)                                             | 1134.5404 |
| TRA2B_RAT | SDSGEQNYGERES(1)R                                                | 1612.6714 |
| RAB3A_RAT | MS(0.336)ES(0.654)LDT(0.01)ADPAVTGAK                             | 1591.74   |

|            |                                                         |           |
|------------|---------------------------------------------------------|-----------|
| MK01_RAT   | VADPDHDHT(0.001)GFLT(0.998)EYVAT(0.001)R                | 2142.997  |
| KCNA2_RAT  | IPS(0.865)S(0.135)PDLKK                                 | 983.56515 |
| KCNA2_RAT  | IPS(0.007)S(0.993)PDLK                                  | 855.47018 |
| KPCG_RAT   | MGPSSSPIPS(0.001)PS(0.004)PS(0.895)PT(0.087)DS(0.012)KR | 2010.9681 |
| KPCG_RAT   | AAPALT(1)PPDR                                           | 1007.54   |
| PGRC1_RAT  | EGEPTVYS(1)DDEEPK                                       | 1722.7108 |
| HS90A_RAT  | EVS(1)DDEAEKEKEKEEK                                     | 2050.8702 |
| HS90A_RAT  | ES(0.944)DDKPEIEDVGS(0.056)DEEEEEKKDGDK                 | 2850.205  |
| HS90A_RAT  | ESDDKPEIEDVGS(1)DEEEEEKK                                | 2435.0347 |
| CPLX2_RAT  | AALEQCEGS(0.883)LT(0.117)RPK                            | 1655.8301 |
| FSCN1_RAT  | VNASAS(0.037)S(0.963)LKK                                | 1003.5662 |
| P97904_RAT | QAEAVT(0.5)S(0.5)PR                                     | 957.48796 |
| P97904_RAT | QAEAVT(0.5)S(0.5)PR                                     | 957.48796 |
| UCHL1_RAT  | QFLS(0.012)ET(0.012)EKLS(0.976)PEDR                     | 1677.821  |
| SV2A_RAT   | GGLS(1)DGEGPPGGR                                        | 1154.5316 |
| AP180_RAT  | KPGNNEGSGAPS(1)PLSK                                     | 1538.7689 |
| CAP1_RAT   | LEAVSHTSDMHCYGDGS(0.847)PS(0.153)K                      | 2176.9154 |
| DYN3_RAT   | RS(1)PPSPTTQR                                           | 1222.6418 |
| SRSF5_RAT  | S(0.455)GS(0.67)RS(0.875)PVPEK                          | 1042.5407 |
| SRSF5_RAT  | S(0.455)GS(0.67)RS(0.875)PVPEK                          | 1042.5407 |
| Q3B8P7_RAT | DADEEDS(1)DEETSHLER                                     | 1875.7242 |
| Q3KR72_RAT | QS(0.019)LGES(0.981)PR                                  | 872.43519 |
| Q3KR72_RAT | T(0.001)LS(0.998)PT(0.001)PSAEGFQDGR                    | 1561.7372 |
| JKIP1_RAT  | T(0.037)PAT(0.963)PEEDLDETTTR                           | 1674.7584 |
| Q3ZB99_RAT | DGS(1)PPPAFKPEPPK                                       | 1462.7456 |
| Q3ZB99_RAT | VQVAPLQGS(1)PPLSHDDR                                    | 1814.9275 |
| Q3ZB99_RAT | Y(0.011)S(0.989)PSYDR                                   | 886.3821  |
| Q499Q4_RAT | AIGGILT(0.03)AS(0.97)HNPGGPNDFGIK                       | 2205.1542 |
| Q499Q4_RAT | AIGGILT(0.5)AS(0.5)HNPGGPNDFGIK                         | 2205.1542 |
| Q499R8_RAT | HTGPNS(1)PDTANDGFVR                                     | 1683.7601 |
| PPME1_RAT  | QCEGIT(0.189)S(0.792)PES(0.016)S(0.003)K                | 1321.582  |
| EFHD2_RAT  | ADLNQGIGEPQS(0.903)PS(0.097)R                           | 1567.759  |
| EIF3B_RAT  | AEEEGGS(0.999)DGS(0.001)AAEAEPR                         | 1660.6813 |
| Q4K1K1_RAT | RPTEAVS(1)PK                                            | 983.53999 |
| TCEA1_RAT  | EPAISSQNS(1)PEAR                                        | 1384.6583 |
| Q4KLL7_RAT | GNDS(1)DGAEASDDPEKK                                     | 1691.6758 |
| Q4KLM7_RAT | LGS(0.002)S(0.998)PTSSCNPTPTK                           | 1532.7141 |
| Q52KJ9_RAT | KVEEEQEADEEDVS(0.997)EET(0.003)ENR                      | 2522.0416 |
| Q562A6_RAT | KS(1)DAGISSADAPR                                        | 1273.6262 |
| Q568Y8_RAT | RDPS(1)LEEIQK                                           | 1213.6303 |
| TM100_RAT  | RES(0.997)QT(0.003)ALVVNQR                              | 1399.7532 |
| Q569C9_RAT | AAGGGGS(1)GEDEAQRS                                      | 1404.5866 |
| Q5BJP4_RAT | DKS(1)PVREPIDNLTPEER                                    | 1994.0069 |

|            |                                                       |           |
|------------|-------------------------------------------------------|-----------|
| AN34A_RAT  | RNT(1)APEAQESGLPSGLR                                  | 1781.902  |
| Q5BKB9_RAT | EPGS(0.997)S(0.003)HLGSPDTAR                          | 1409.6535 |
| Q5D059_RAT | RDYDDMS(1)PR                                          | 1153.4822 |
| Q5EB49_RAT | YDLDFKS(1)PDDASR                                      | 1527.6842 |
| Q5EB89_RAT | IGHHS(0.997)T(0.003)SDDSSAYR                          | 1531.6651 |
| Q5FV10_RAT | S(0.008)ES(0.992)LDEEEKLELQR                          | 1703.8214 |
| RUFY3_RAT  | ELDDIS(0.518)LT(0.463)PDPEPT(0.019)HEDPNYLMANER       | 3010.3502 |
| ATG9A_RAT  | HPEPVPEEGS(1)EDELPPQVHK                               | 2249.06   |
| ATG9A_RAT  | RES(0.719)DES(0.273)GES(0.008)APEEGGEGAR              | 1947.8042 |
| IMPCT_RAT  | NFTNS(0.998)PEES(0.002)AK                             | 1222.5466 |
| Q5HZA7_RAT | S(0.003)PS(0.997)PPPDGSPAATPEIR                       | 1674.8213 |
| Q5HZA7_RAT | S(0.01)PS(0.142)PPPDGS(0.777)PAAT(0.071)PEIR          | 1674.8213 |
| PP1R7_RAT  | VES(1)EES(1)GDEEGKK                                   | 1421.6158 |
| PP1R7_RAT  | VES(1)EES(1)GDEEGKK                                   | 1421.6158 |
| S35G2_RAT  | EDYQEILDS(1)PIK                                       | 1448.7035 |
| TR150_RAT  | ASVSDLS(1)PR                                          | 930.47706 |
| TR150_RAT  | IDIS(0.999)PS(0.001)TFR                               | 1034.5397 |
| Q5M970_RAT | LEGNS(1)PQGSSHGVK                                     | 1395.6743 |
| QCR6_RAT   | LES(1)CDRR                                            | 934.42906 |
| PP4P1_RAT  | IINLGPVHPGPLS(1)PEPQPMGVR                             | 2304.2413 |
| ITM2C_RAT  | AAAS(0.001)GPASASAPAAEILLT(0.999)PAR                  | 1992.064  |
| RCAS1_RAT  | KLS(1)GDQITLPTTVDYSSVPK                               | 2148.1314 |
| BORG1_RAT  | LHLES(1)PQPSPK                                        | 1231.6561 |
| BORG1_RAT  | LHLESPQPS(1)PK                                        | 1231.6561 |
| Q5PQR0_RAT | GRLS(1)PVPVPR                                         | 1076.6455 |
| AKA12_RAT  | GLAS(1)PDR                                            | 714.36605 |
| AKA12_RAT  | GPLEAPQDGEAEEGT(0.002)T(0.043)S(0.954)DGEK            | 2115.908  |
| AKA12_RAT  | RPS(0.015)ES(0.985)DKEEELEK                           | 1574.7424 |
| Q5RJ9_RAT  | GVDKPPS(0.984)PS(0.016)PIEMK                          | 1480.7596 |
| Q5RJK5_RAT | SLS(0.008)DS(0.159)ES(0.652)DDS(0.181)K               | 1168.4732 |
| Q5RJN5_RAT | EEVAS(1)EPEEAASPITPK                                  | 1782.8523 |
| Q5RKG9_RAT | SQSS(0.001)DTEQPS(0.938)PT(0.052)S(0.008)GGGK         | 1648.7176 |
| P33MX_RAT  | HPASAQSSPS(0.004)S(0.013)T(0.044)PHS(0.147)S(0.791)PK | 1788.8391 |
| MCES_RAT   | GGGS(1)EDEPSPGGLTER                                   | 1543.675  |
| MCES_RAT   | TQDDLVEQNSSYVQDS(0.894)PS(0.106)K                     | 2138.9604 |
| FBX9_RAT   | AVEEEQNGALY(1)EAIK                                    | 1662.8101 |
| UBA1_RAT   | AT(0.193)LPS(0.807)PDKLPGFK                           | 1369.7606 |
| PEA15_RAT  | QPS(1)EEEEIK                                          | 1071.5448 |
| Q5XI21_RAT | LPNLAS(0.954)PS(0.046)AEGPPRCPGAAPR                   | 2211.1219 |
| RAVR1_RAT  | AADVSVT(0.006)HRPPLS(0.993)PEAEAEATPETVDR             | 2973.4316 |
| SZRD1_RAT  | ILGS(0.017)AS(0.983)PEEQEKPIIDRPTR                    | 2364.2285 |
| MFRIL_RAT  | NAS(1)VPNLR                                           | 869.47191 |
| PGRC2_RAT  | LLKPGEEPS(0.001)EYT(0.998)DEEDT(0.001)K               | 2078.9532 |



|            |                                                          |           |
|------------|----------------------------------------------------------|-----------|
| DGLA_RAT   | GS(0.995)PS(0.005)LHAVLER                                | 1164.6251 |
| SYT7_RAT   | NSLET(0.025)VGT(0.974)PDS(0.001)GR                       | 1331.6317 |
| UN13A_RAT  | ALS(1)PTGSSR                                             | 874.45084 |
| Q62861_RAT | EQKLS(0.617)T(0.383)DDLK                                 | 1175.6034 |
| Q62861_RAT | TEEEGKT(1)DGEGNAEDGAK                                    | 1835.7657 |
| DPYL3_RAT  | GS(1)PTRPNPPVR                                           | 1176.6364 |
| DPYL3_RAT  | GMYDGPVFDLT(0.032)T(0.572)T(0.396)PK                     | 1640.7756 |
| CAMKV_RAT  | AT(0.917)PAT(0.043)EES(0.02)T(0.02)VPAAQSSAAPAAK         | 2055.012  |
| CAMKV_RAT  | AT(0.324)PAT(0.67)EES(0.003)T(0.003)VPAAQSSAAPAAK        | 2055.012  |
| Q63094_RAT | AGAY(0.031)DFPS(0.968)PEWDT(0.001)VTPEAK                 | 2079.9426 |
| PTPRN_RAT  | AEDS(0.5)S(0.5)EGHEEEVLGGHGEK                            | 1994.8454 |
| PTPRN_RAT  | AEDS(0.417)S(0.583)EGHEEEVLGGHGEK                        | 1994.8454 |
| PTPR2_RAT  | LEEQADS(0.004)IAGAIQS(0.004)DPVEGS(0.979)QES(0.013)HGR   | 2709.2478 |
| DLG2_RAT   | AIS(1)LEGEPR                                             | 970.50836 |
| DLG2_RAT   | HYS(1)PVECDK                                             | 1133.4812 |
| DLG2_RAT   | LCDKPAS(1)PR                                             | 1042.523  |
| DLG2_RAT   | YQDEEDGPHDHS(1)LPR                                       | 1664.7179 |
| PHRF1_RAT  | HSGS(0.03)RS(0.97)RGR                                    | 998.51182 |
| EI2BE_RAT  | AGS(1)PQLDDIR                                            | 1070.5356 |
| RTN1_RAT   | DKDSEVSTKPEGVHAPNQPS(1)PVEGK                             | 2631.2776 |
| RTN1_RAT   | REQDS(1)PPMKPGVLDAIR                                     | 1907.9887 |
| RTN1_RAT   | SPPVAMETASTGVAAVPDLDHS(0.157)S(0.157)S(0.554)PT(0.132)LK | 2835.396  |
| C2D1A_RAT  | LANHEEGS(1)DEEEETPKK                                     | 2069.9025 |
| HS105_RAT  | IES(1)PKLER                                              | 970.54475 |
| Q66H15_RAT | T(0.133)T(0.814)AS(0.052)PS(0.001)QVR                    | 945.48796 |
| Q66LH8_RAT | T(0.063)GPVEEAQLS(0.937)VEEK                             | 1514.7464 |
| EF1D_RAT   | AT(0.001)APQT(0.049)QHVS(0.951)PMR                       | 1422.7038 |
| EF1D_RAT   | KGATPAEDEDNDIDLFGS(1)DEEEEDKEAAR                         | 3309.3917 |
| EF1D_RAT   | ATAPQT(0.962)QHVS(0.038)PMR                              | 1422.7038 |
| DEK_RAT    | SAAAAPAAEGEDT(0.169)PT(0.793)PPAS(0.038)EKEPEMPGPR       | 2860.3185 |
| PAIRB_RAT  | S(0.036)KS(0.296)EEAHAEDS(0.667)VMDHHFR                  | 2110.9127 |
| SCPD_L_RAT | S(0.422)VS(0.578)NLKPVPVIGSK                             | 1423.8399 |
| WIPI2_RAT  | GAYVPS(0.993)S(0.006)PTR                                 | 1033.5193 |
| CQ062_RAT  | LES(0.999)PS(0.001)ER                                    | 816.39775 |
| Q6AYE1_RAT | HIEPELAGRDS(1)PVR                                        | 1574.8165 |
| RNPS1_RAT  | RFS(1)PPR                                                | 758.41876 |
| Q6IE67_RAT | ESLKEEDES(1)DDDNM                                        | 1654.6152 |
| Q6IRG3_RAT | GS(0.055)DS(0.944)DSEGDNPEK                              | 1335.5062 |
| Q6IRG7_RAT | FYYSSGS(0.003)S(0.022)S(0.911)PT(0.064)HAK               | 1517.6787 |
| Q6IRK8_RAT | KLDPAQS(0.671)AS(0.329)R                                 | 1071.5673 |
| Q6IRK8_RAT | KLDPAQS(0.064)AS(0.936)RENLEEQGSIALR                     | 2524.3245 |
| Q6IRK8_RAT | S(1)LQQLAEER                                             | 1072.5513 |
| PPR1B_RAT  | VS(0.718)EHS(0.301)S(0.981)PEEESSPHQR                    | 1820.7925 |

|            |                                                     |           |
|------------|-----------------------------------------------------|-----------|
| PPR1B_RAT  | VS(0.718)EHS(0.301)S(0.981)PEEESSPHQR               | 1820.7925 |
| Q6JB17_RAT | ISINQT(0.995)PGT(0.005)K                            | 1057.5768 |
| Q6LBV1_RAT | NVT(0.001)ES(0.117)PS(0.764)FS(0.117)AGDNPHVLYSPEFR | 2549.1823 |
| ABCF1_RAT  | GAEQGS(1)EEEEKEEK                                   | 1448.6267 |
| ABCF1_RAT  | QLS(0.001)VPAS(0.999)DEEDEVVPVPR                    | 2062.0219 |
| Q6MG76_RAT | GDAAS(0.083)AS(0.902)PS(0.012)S(0.002)TPLIR         | 1428.7209 |
| Q6P6G9_RAT | SES(1)PKEPEQLR                                      | 1298.6466 |
| Q6P7A8_RAT | AEKPS(0.573)ALNS(0.427)EEEEHEQSTEQDK                | 2456.0939 |
| Q6P7A8_RAT | AEKPS(0.172)ALNS(0.827)EEEEHEQSTEQDK                | 2456.0939 |
| Q6P7A8_RAT | AEKPS(0.181)ALNS(0.805)EEEEHEQS(0.537)T(0.477)EQDK  | 2456.0939 |
| Q6P7A8_RAT | GEES(1)QEQPVS DSHQQQDESGK                           | 2327.9738 |
| ATLA1_RAT  | S(0.009)S(0.013)DWS(0.985)S(0.993)EEEEPVRK          | 1663.7326 |
| ATLA1_RAT  | S(0.009)S(0.013)DWS(0.985)S(0.993)EEEEPVRK          | 1663.7326 |
| ARP19_RAT  | VT(0.09)S(0.91)PEKAEEAK                             | 1187.6034 |
| Q719L2_RAT | HPPT(1)PPDPSGGLPR                                   | 1423.7208 |
| Q75T81_RAT | RDS(0.904)DMT(0.096)GHIQQPGGR                       | 1653.7642 |
| Q7TP42_RAT | GAPGDHGPEGS(1)GGER                                  | 1378.5862 |
| Q7TP17_RAT | KES(1)PPPLVPPAAR                                    | 1357.7718 |
| PPM1E_RAT  | RPWPQHQCS(0.999)APADLGY(0.001)EGR                   | 2224.0232 |
| MAST1_RAT  | AALS(1)PVQEHETGR                                    | 1393.695  |
| GPM6A_RAT  | S(1)KEEQELHDIHSTR                                   | 1707.8176 |
| Q8CH90_RAT | S(1)PPGPPGSR                                        | 850.42972 |
| Q8CIT3_RAT | LPT(0.008)S(0.186)S(0.806)PGAPGR                    | 1038.5458 |
| Q8K4Y6_RAT | NRVS(0.999)QS(0.001)GLSPER                          | 1328.6797 |
| Q8K4Y6_RAT | VSQSGLS(1)PER                                       | 1058.5356 |
| Q8R5H2_RAT | LAEMYGGGES(1)DKDA                                   | 1441.6031 |
| Q8VHJ9_RAT | LPLPDDHDL(1)DR                                      | 1391.6681 |
| HDGF_RAT   | RAGDMLEDS(1)PK                                      | 1217.571  |
| HDGF_RAT   | GNAEGS(1)S(1)DEEGKLVIDEPAK                          | 2043.9597 |
| HDGF_RAT   | GNAEGS(1)S(1)DEEGKLVIDEPAK                          | 2043.9597 |
| CCG3_RAT   | DLS(1)PISK                                          | 758.41742 |
| SEPT2_RAT  | IYHLPDAES(1)DEDEDKF                                 | 1921.8218 |
| PALM_RAT   | S(0.997)PGGS(0.002)T(0.001)MMK                      | 894.39392 |
| PALM_RAT   | KS(0.216)T(0.785)PVRS(0.353)PGGS(0.508)T(0.138)MMK  | 1562.7909 |
| PALM_RAT   | KS(0.973)T(0.888)PVRS(0.11)PGGS(0.022)T(0.007)MMK   | 1562.7909 |
| Q923I5_RAT | EIKPSEKPV(1)PK                                      | 1337.7555 |
| Q923I5_RAT | KPS(1)DEEFAVR                                       | 1176.5775 |
| ACBG1_RAT  | ES(0.692)PS(0.308)HGLELSAPEK                        | 1479.7205 |
| ACBG1_RAT  | ES(0.469)PS(0.529)HGLELS(0.002)APEK                 | 1479.7205 |
| P4K2A_RAT  | VAAAGS(0.005)GPS(0.995)PPCSPGHDR                    | 1718.7795 |
| PP14A_RAT  | GPGGS(1)PSGLQK                                      | 983.50361 |
| PP14A_RAT  | QPGFPQPS(0.006)PS(0.032)DDPS(0.069)LS(0.892)PR      | 1907.9014 |
| Q99PA1_RAT | MLPHAPGVQMQAIPEDAVHEDS(1)GDEDGEDPDKR                | 3584.5784 |

|            |                                                    |           |
|------------|----------------------------------------------------|-----------|
| Q99PJ8_RAT | EKDPHRPLS(1)PTER                                   | 1560.8009 |
| Q99PR9_RAT | DAS(1)PVGVK                                        | 771.41267 |
| NHRF1_RAT  | EALVEPASES(1)PRPALAR                               | 1791.9479 |
| HNRPD_RAT  | NEEDEGHS(0.037)NS(0.587)S(0.376)PR                 | 1456.5815 |
| Q9JJ76_RAT | IQQAGNT(0.022)S(0.978)PR                           | 1070.5469 |
| S1PR5_RAT  | DGMDTSCST(0.003)GS(0.997)PGAATANR                  | 1854.7472 |
| S1PR5_RAT  | S(0.556)PS(0.444)AVGPSGGGLR                        | 1140.5887 |
| Q9JLT5_RAT | LNAT(0.001)T(0.011)S(0.988)LEQDK                   | 1218.6092 |
| S38A1_RAT  | RS(0.975)LT(0.014)NS(0.011)HLEK                    | 1183.6309 |
| Q9QXG3_RAT | HSAILAS(1)PNPDEK                                   | 1377.6888 |
| Q9QXG3_RAT | TAKDS(1)DDDDVTVTVDR                                | 1865.8127 |
| SRCN1_RAT  | KDS(0.814)GS(0.166)S(0.017)S(0.003)VFAESPGGK       | 1538.7213 |
| SRCN1_RAT  | DS(0.006)GS(0.029)S(0.029)S(0.029)VFAES(0.908)PGGK | 1410.6263 |
| SRCN1_RAT  | FRQS(1)LPLSR                                       | 1102.6247 |
| SRCN1_RAT  | RGS(1)DELTVPR                                      | 1128.5887 |
| SRCN1_RAT  | S(1)PNTAILIK                                       | 955.57023 |
| YTDC1_RAT  | GIS(1)PIVFDR                                       | 1002.5498 |
| CHSP1_RAT  | DRS(1)PS(1)PLR                                     | 926.49338 |
| CHSP1_RAT  | DRS(1)PS(1)PLR                                     | 926.49338 |
| CHSP1_RAT  | GNVVPS(1)PLPTR                                     | 1135.635  |
| SHAN1_RAT  | ALT(0.025)AS(0.975)PPAAR                           | 953.52943 |
| SHAN1_RAT  | EQDVVPFQES(1)PK                                    | 1401.6776 |
| CNKR2_RAT  | GS(0.424)ES(0.576)PNSFLDQEYR                       | 1627.7114 |
| CNKR2_RAT  | LGDS(1)LQDLR                                       | 1178.5932 |
| CNKR2_RAT  | QEV(0.011)GS(0.23)S(0.731)AVS(0.028)PIRK           | 1457.7838 |
| CNKR2_RAT  | QEV(0.011)GS(0.23)S(0.731)AVS(0.028)PIRK           | 1329.6888 |
| LYRIC_RAT  | SQEPIS(0.001)NDQKDS(0.999)DDDKEK                   | 2076.9084 |
| VDAC1_RAT  | LTFDSSFS(1)PNTGK                                   | 1399.662  |
| R9PXR4_RAT | AS(0.999)PALGS(0.001)GPDGSGDSLEMSSDR               | 2204.9856 |
| R9PXV8_RAT | RPAAAAAAGSAS(1)PR                                  | 1252.6636 |
| X4YHC6_RAT | LDNT(0.001)PAS(0.999)PPR                           | 1066.5407 |

## References

1. Z. Xiong, Y. Chen, L. Zhang, J. Ren, Q. Zhang, M. Ye, W. Zhang and H. Zou, *ACS Appl. Mater. Interfaces*, 2014, **6**, 22743.
2. F. Jabeen, M. N. Haq, M. N. Ashiq, M. Rainer, C. W. Huck and G. K. Bonn, *J. Sep. Sci.*, 2016, **39**, 4175.
3. R. X. Su, W. Qi, Z. M. He, S. X. Yuan and Y. B. Zhang, *Food Chemistry*, 2007, **104**, 276.
4. T. E. Thingholm, O. N. Jensen, P. J. Robinson and M. R. Larsen, *Molecular & cellular proteomics : MCP*, 2008, **7**, 661.
5. H. J. Zhou, R. J. Tian, M. L. Ye, S. Y. Xu, S. Feng, C. S. Pan, X. G. Jiang, X. Li and H. F. Zou, *Electrophoresis*, 2007, **28**, 2201.
